# 1 **Functional reconstitution of a bacterial CO<sub>2</sub> concentrating mechanism** 2 **in *E. coli***

3 **Authors:** Avi I. Flamholz<sup>1</sup>, Eli Dugan<sup>1</sup>, Cecilia Blikstad<sup>1</sup>, Shmuel Gleizer<sup>2</sup>, Roe Ben-Nissan<sup>2</sup>,  
4 Shira Amram<sup>2</sup>, Niv Antonovsky<sup>2,†</sup>, Sumedha Ravishankar<sup>1,‡</sup>, Elad Noor<sup>2,§</sup>, Arren Bar-Even<sup>3</sup>, Ron  
5 Milo<sup>2,\*</sup> & David F. Savage<sup>1,\*</sup>

## 6 **Affiliations:**

7 <sup>1</sup> Department of Molecular and Cell Biology, University of California, Berkeley, California 94720,  
8 United States

9 <sup>2</sup> Department of Plant and Environmental Sciences, Weizmann Institute of Science, Rehovot  
10 76100, Israel

11 <sup>3</sup> Max Planck Institute of Molecular Plant Physiology, Am Mühlenberg 1, 14476 Potsdam,  
12 Germany

13 <sup>†</sup> Present address: Laboratory of Genetically Encoded Small Molecules, The Rockefeller  
14 University, 1230 York Avenue, New York, NY, 10065, USA

15 <sup>‡</sup> Present address: Division of Biological Sciences, Section of Molecular Biology, University of  
16 California, San Diego, La Jolla, California, 92093, United States.

17 <sup>§</sup> Present address: Institute of Molecular Systems Biology, Eidgenössische Technische  
18 Hochschule Zürich, Zürich CH-8093, Switzerland

19 \*Correspondence to: [ron.milo@weizmann.ac.il](mailto:ron.milo@weizmann.ac.il) (R.M.) and [savage@berkeley.edu](mailto:savage@berkeley.edu) (D.F.S.)  
20  
21

## 22 **Abstract**

23 Many photosynthetic organisms employ a CO<sub>2</sub> concentrating mechanism (CCM) to increase the  
24 rate of CO<sub>2</sub> fixation. CCMs catalyze ≈50% of global photosynthesis, yet it remains unclear which  
25 genes and proteins are required to produce this complex adaptation. We describe the construction  
26 of a functional CCM in a non-native host, achieved by expressing genes from an autotrophic  
27 bacterium in an engineered *E. coli* strain. Expression of 20 CCM genes enabled *E. coli* to grow  
28 by fixing CO<sub>2</sub> from ambient air into biomass, with growth depending on CCM components.  
29 Bacterial CCMs are therefore genetically compact and readily transplanted, rationalizing their  
30 presence in diverse bacteria. Reconstitution enabled genetic experiments refining our  
31 understanding of the CCM, laying the groundwork for deeper study and engineering of  
32 mechanisms enhancing CO<sub>2</sub> assimilation.

## 33 **One Sentence Summary**

34 A bacterial CO<sub>2</sub> concentrating mechanism enables *E. coli* to fix CO<sub>2</sub> from ambient air.

## 35 Main Text

36 Nearly all carbon in the biosphere enters by CO<sub>2</sub> fixation in the Calvin-Benson-Bassham cycle  
37 (1). Ribulose Bisphosphate Carboxylase/Oxygenase - commonly known as rubisco - is the CO<sub>2</sub>  
38 fixing enzyme in this cycle (2) and likely the most abundant enzyme on Earth (3). As rubisco is  
39 abundant and central to biology, one might expect it to be an exceptional catalyst, but it is not.  
40 Photosynthetic rubiscos are modest enzymes, with carboxylation turnover numbers ( $k_{cat}$ ) ranging  
41 from 1-10 s<sup>-1</sup> (4). Moreover, all known rubiscos catalyze a competing oxygenation of the five-  
42 carbon organic substrate, ribulose 1,5-bisphosphate (4, 5).

43  
44 Rubisco arose > 2.5 billion years ago, when Earth's atmosphere contained little O<sub>2</sub> and abundant  
45 CO<sub>2</sub> (6, 7). In this environment, rubisco's eponymous oxygenase activity could not have hindered  
46 carbon fixation or the growth of CO<sub>2</sub>-fixing organisms. Present-day atmosphere, however, poses  
47 a problem for plants and other autotrophs: their primary carbon source, CO<sub>2</sub>, is relatively scarce  
48 (≈0.04%) while a potent competing substrate, O<sub>2</sub>, is abundant (≈21%).

49  
50 CO<sub>2</sub> concentrating mechanisms (CCMs) arose multiple times over the last 2 billion years (1, 8)  
51 and overcome this problem by concentrating CO<sub>2</sub> near rubisco (Fig. 1A). In elevated CO<sub>2</sub>  
52 environments most active sites are occupied with CO<sub>2</sub> and not O<sub>2</sub>. As such, high CO<sub>2</sub> increases  
53 the rate of carboxylation and competitively inhibits oxygenation (5) thereby improving overall  
54 carbon assimilation (Figure 1B). Today, at least four varieties of CCMs are found in plants, algae  
55 and bacteria (1, 8), organisms with CCMs are collectively responsible for ≈50% of global net  
56 photosynthesis (1), and some of the most productive human crops (e.g. maize and sugarcane)  
57 rely on CCMs.

58

59 CCMs are particularly common among autotrophic bacteria: all Cyanobacteria and many  
60 Proteobacteria have CCM genes (9, 10). Bacterial CCMs rely on two crucial features: (i) energy-  
61 coupled inorganic carbon uptake at the cell membrane and (ii) a 200+ MDa protein organelle  
62 called the carboxysome that encapsulates rubisco with a carbonic anhydrase enzyme (11, 12). In  
63 the prevailing model of the carboxysome CCM, inorganic carbon uptake produces a high, above-  
64 equilibrium cytosolic  $\text{HCO}_3^-$  concentration ( $\approx 30$  mM) that diffuses into the carboxysome, where it  
65 is converted by into a high carboxysomal  $\text{CO}_2$  concentration by carbonic anhydrase (Fig. 1A).

66  
67 As CCMs accelerate  $\text{CO}_2$  fixation, there is great interest in transplanting them into crops (11, 13).  
68 Carboxysome-based CCMs are especially attractive because they natively function in single cells  
69 and appear to rely on a tractable number of genes (14–17). Modeling suggests that introducing  
70 bacterial CCM components could improve plant photosynthesis (11), especially if aspects of plant  
71 physiology can be modulated via genetic engineering (18). However, expressing bacterial  
72 rubiscos and carboxysome components has, so far, uniformly resulted in transgenic plants  
73 displaying impaired growth (14–17). More generally, as our understanding of the genes and  
74 proteins participating in the carboxysome CCM rests mostly on loss-of-function genetic  
75 experiments in native hosts (19–22), it is possible that some genetic, biochemical and  
76 physiological aspects of CCM function remain unappreciated. We therefore sought to test whether  
77 current understanding is sufficient to reconstitute the bacterial CCM in a non-native bacterial host,  
78 namely *E. coli*.

79  
80 Using a genome-wide screen in the  $\text{CO}_2$ -fixing proteobacterium *H. neapolitanus*, we recently  
81 demonstrated that a 20-gene cluster encodes all activities required for the CCM, at least in  
82 principle (22). These genes include rubisco large and small subunits, the carboxysomal carbonic  
83 anhydrase, seven structural proteins of the  $\alpha$ -carboxysome (23), an energy-coupled inorganic

84 carbon transporter (22, 24), three rubisco chaperones (25–27), and four genes of unknown  
85 function (Fig. 1C). We aimed to test whether these genes are sufficient to establish a functioning  
86 CCM in *E. coli*.

87  
88 For this purpose, we designed an *E. coli* strain that depends on rubisco carboxylation for growth.  
89 To grow on glycerol as the sole carbon source, *E. coli* must synthesize ribose 5-phosphate (Ri5P)  
90 for nucleic acids. Synthesis of Ri5P via the pentose phosphate pathway forces co-production of  
91 ribulose 5-phosphate (Ru5P). Deletion of ribose 5-phosphate isomerase (*rpiAB* genes), however,  
92 makes Ru5P a metabolic “dead-end” (Fig. 2A). Expression of phosphoribulokinase (*prk*) and  
93 rubisco creates a “detour” pathway converting Ru5P and CO<sub>2</sub> into two units of the central  
94 metabolite 3-phosphoglycerate (3PG), thereby enabling Ru5P metabolism and growth (Fig. 2A).  
95 Additionally, cytosolic carbonic anhydrase activity is incompatible with the bacterial CCM (28).  
96 We therefore constructed a strain, named CCMB1 for “**CCM Background 1**”, lacking *rpiAB* and all  
97 endogenous carbonic anhydrases (Methods).

98  
99 As predicted, CCMB1 required rubisco and *prk* for growth on glycerol minimal media in 10% CO<sub>2</sub>  
100 (Fig. 2B-C). Even when expressing rubisco and *prk* on the p1A plasmid (Fig. 2B), however,  
101 CCMB1 failed to grow on glycerol in ambient air (Figs. 2D and S3-4) presumably due to insufficient  
102 carboxylation at low CO<sub>2</sub>. That is, CCMB1:p1A displays the “high-CO<sub>2</sub> requiring” phenotype that  
103 is the hallmark of CCM mutants (19, 20).

104  
105 We expected that a functional CO<sub>2</sub>-concentrating mechanism would cure CCMB1 of its high-CO<sub>2</sub>  
106 requirement and permit growth in ambient air. We therefore generated two plasmids, pCB and  
107 pCCM, that together express all 20 genes from the *H. neapolitanus* CCM cluster (Figs. 1C and  
108 S5A). pCB encodes ten carboxysome genes (23), including rubisco large and small subunits,

109 along with *prk*. The remaining *H. neapolitanus* genes, including putative rubisco chaperones (25–  
110 27) and an inorganic carbon transporter (22, 24), were cloned into the second plasmid, pCCM.

111  
112 CCMB1 co-transformed with pCB and pCCM initially failed to grow on glycerol media in ambient  
113 air. We therefore conducted selection experiments, described fully in the supplement, that  
114 resulted in the isolation of mutant plasmids conferring growth in ambient air. Briefly, CCMB1:pCB  
115 + pCCM cultures were grown to saturation in 10% CO<sub>2</sub> and multiple dilutions were plated on  
116 glycerol minimal media (Methods). Colonies became visible after 20 days of incubation in ambient  
117 air (Fig. S5). Deep-sequencing of plasmid DNA revealed mutations in regulatory sequences (e.g.  
118 a promoter and transcriptional repressor) but none in sequences coding for CCM components  
119 (Table S4). Individual post-selection plasmids pCB' and pCCM' were reconstructed by PCR,  
120 resequenced, and transformed into naive CCMB1 (Methods). As shown in Figs. 3A and S6, pCB'  
121 and pCCM' together enabled reproducible growth of CCMB1 in ambient air, suggesting that the  
122 20 genes expressed are sufficient to produce a heterologous CCM without any genomic  
123 mutations.

124  
125 To verify that growth in ambient air depends on the CCM, we generated plasmids carrying  
126 targeted mutations (Fig. S7). An inactivating mutation to the carboxysomal rubisco (CbbL K194M)  
127 prohibited growth entirely. Mutations targeting the CCM, rather than rubisco itself, should ablate  
128 growth in ambient air while permitting growth in high CO<sub>2</sub>. Consistent with this understanding, an  
129 inactive mutant of the carboxysomal carbonic anhydrase (CsoSCA C173S) required high-CO<sub>2</sub> for  
130 growth. Similarly, disruption of carboxysome formation by removal of the pentameric shell proteins  
131 or the N-terminal domain of CsoS2 also eliminated growth in ambient air. Removing the  
132 pentameric proteins CsoS4AB disrupts the permeability barrier at the carboxysome shell (21),  
133 while truncating CsoS2 prohibits carboxysome formation entirely (29). Finally, an inactivating  
134 mutation to the inorganic carbon transporter also eliminated growth in ambient air (22).

135

136 These experiments demonstrate that pCB' and pCCM' enable CCMB1 to grow in ambient air in a  
137 manner that depends on the known components of the bacterial CCM. To confirm that these cells  
138 produce carboxysome structures, we performed thin section electron microscopy. Regular  
139 polyhedral inclusions of  $\approx 100$  nm diameter were visible in micrographs (Figs. 3B), implying  
140 production of morphologically-normal carboxysomes.

141

142 We next conducted isotopic labeling experiments to determine whether CCMB1:pCB' + pCCM'  
143 fixes CO<sub>2</sub> from ambient air into biomass. Cells were grown in minimal media with <sup>13</sup>C-labeled  
144 glycerol as the sole organic carbon source, such that CO<sub>2</sub> from ambient air was the dominant  
145 source of <sup>12</sup>C. The isotopic composition of amino acids in total biomass hydrolysate was analyzed  
146 via mass spectrometry (Methods). As the rubisco product 3PG is a precursor for serine  
147 biosynthesis, we expected excess <sup>12</sup>C on serine when rubisco is active (Fig. 3C). Serine from  
148 CCMB1:pCB'+pCCM' cells contained roughly threefold more <sup>12</sup>C than a rubisco-independent  
149 control (Figs. 3D). We estimated the contribution of rubisco to 3PG synthesis *in vivo* by comparing  
150 labeling patterns between experiment and control (Methods). Rubisco carboxylation was  
151 responsible for at least 10% of 3PG synthesis in all four biological replicates (Fig. 3E, Methods),  
152 confirming fixation of CO<sub>2</sub> from ambient air. As such, this represents the first functional  
153 reconstitution of any CCM.

154

155 Reconstitution enabled us to investigate which *H. neapolitanus* genes are necessary for CCM  
156 function. We focused on genes involved in rubisco proteostasis and generated plasmids lacking  
157 acRAF, a putative rubisco chaperone, or carrying targeted mutations to CbbQ, an ATPase  
158 involved in activating rubisco catalysis (25–27). Although *acRAF* deletion had a large negative

159 effect in *H. neapolitanus* (22), neither acRAF nor CbbQ were required for CCMB1 to grow in  
160 ambient air. Consistent with a screen in the native host (22), however, *acRAF* deletion produced  
161 a substantial growth defect (Fig. S7C). Further such experiments can test hypotheses about  
162 carboxysome biogenesis (23, 29), probe the relationship between CCMs and host physiology (12,  
163 28), and define a minimal reconstitution of the bacterial CCM suitable for plant expression (15–  
164 17, 30).

165  
166 Today, CCMs catalyze about half of global photosynthesis (1), but this was not always so. Land  
167 plant CCMs, for example, arose only in the last 100 million years (1, 8). Though all contemporary  
168 Cyanobacteria have CCM genes, these CCMs are found in two convergently-evolved varieties  
169 (8–10), suggesting that the ancestor of present-day Cyanobacteria and chloroplasts did not have  
170 a CCM (9). So how did carboxysome CCMs come to dominate the cyanobacterial phylum?

171  
172 Here we demonstrated that the  $\alpha$ -carboxysome CCM from *H. neapolitanus* is readily transferred  
173 between species and confers a large growth benefit, which can explain how these CCMs became  
174 so widespread among bacteria (9, 10). We constructed a CCM by expressing 20 genes in an  
175 engineered *E. coli* strain, CCMB1. In accordance with its role in native autotrophic hosts (16, 19,  
176 20, 22), the transplanted CCM required  $\alpha$ -carboxysomes and inorganic carbon uptake to enable  
177 CCMB1 to grow by fixing CO<sub>2</sub> from ambient air (Fig. 3 and S6-8). It appears, therefore, that the  
178  $\alpha$ -carboxysome CCM is genetically compact and “portable.” As such, it is possible that expressing  
179 bacterial CCMs in non-native autotrophic hosts will improve CO<sub>2</sub> assimilation and growth. Our  
180 approach to studying CCMs by reconstitution in tractable non-native hosts can also be applied to  
181 study other CCMs, including  $\beta$ -carboxysome CCMs, the algal pyrenoid, and plausible evolutionary  
182 ancestors (8). We hope such studies will further our principled understanding of, and capacity to  
183 engineer, the cell biology supporting CO<sub>2</sub> fixation in diverse organisms.

184



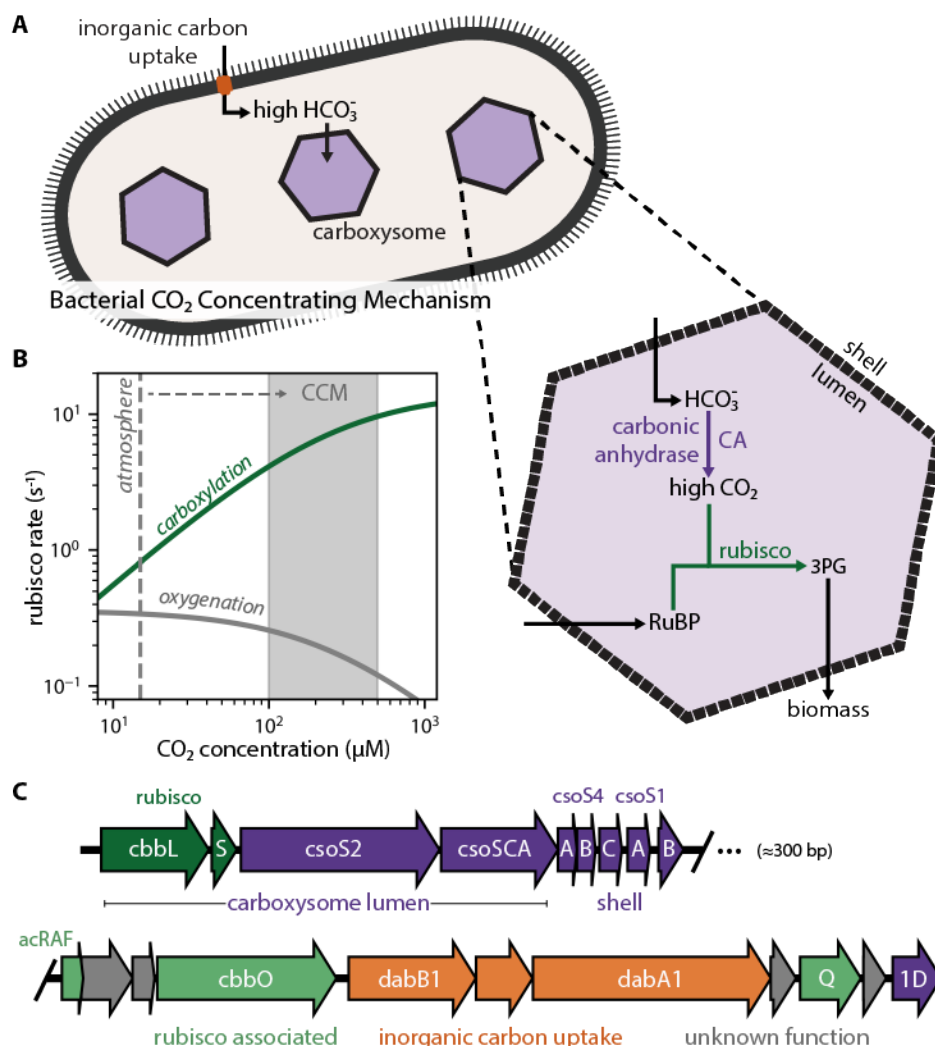

185  
 186 **Fig. 1. Twenty genes form the basis of a bacterial CCM.** (A) The bacterial CCM consists of at  
 187 least two essential components - energy-coupled carbon uptake and carboxysome structures that  
 188 encapsulate rubisco with a carbonic anhydrase (CA) enzyme (11, 12). Transport generates a  
 189 large cytosolic  $\text{HCO}_3^-$  pool, which is rapidly converted to high carboxysomal  $\text{CO}_2$  concentration  
 190 by the carboxysomal CA. (B) Elevated  $\text{CO}_2$  increases the rubisco carboxylation rate (green) and  
 191 suppresses oxygenation by competitive inhibition (grey).  $[\text{O}_2]$  was set to 270  $\mu\text{M}$  for rate  
 192 calculations. (C) *H. neapolitanus* CCM genes are mostly contained in a 20 gene cluster (22)  
 193 expressing rubisco and its associated chaperones (green), carboxysome structural proteins  
 194 (purple), and an inorganic carbon transporter (orange).



195

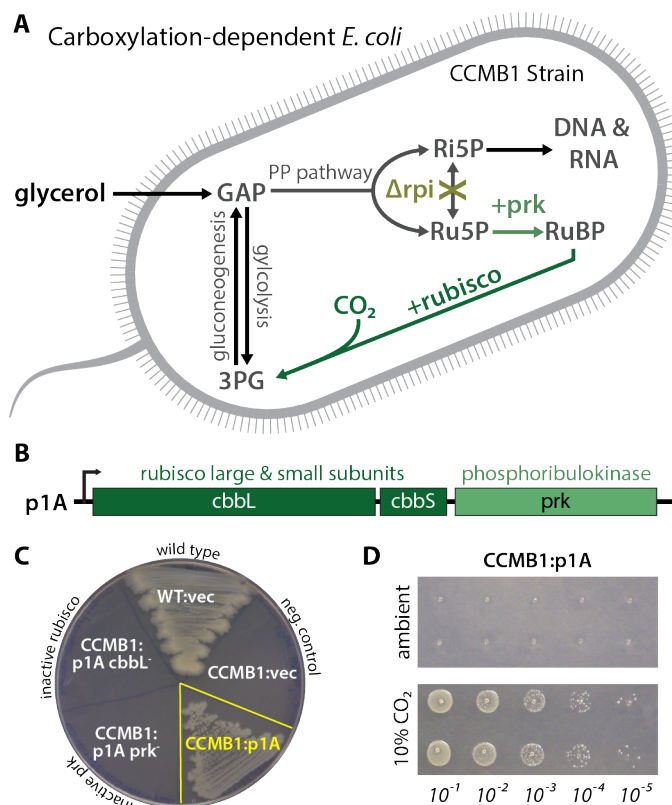

196

197

198 **Fig. 2. CCMB1 depends on rubisco carboxylation for growth on glycerol.** (A) Ribose-5-

199 phosphate (Ri5P) is required for nucleotide biosynthesis. Deletion of ribose-phosphate isomerase

200 ( $\Delta rpi$ ) in CCMB1 blocks ribulose-5-phosphate (Ru5P) metabolism in the pentose phosphate (PP)

201 pathway. Expression of rubisco (*H. neapolitanus cbbLS*) and phosphoribulokinase (*S. elongatus*

202 PCC7942 *prk*) on the *p1A* plasmid (B) permits Ru5P metabolism, thus enabling growth on M9

203 glycerol media in 10%  $CO_2$  (C). Mutating the rubisco active site (*p1A cbbL*<sup>-</sup>) abrogates growth, as

204 does mutating ATP-binding residues of *prk* (*p1A prk*<sup>-</sup>). (D) CCMB1:*p1A* grows well under 10%

205  $CO_2$ , but fails to grow in ambient air. Cells grown on M9 glycerol media throughout. Acronyms:

ribulose 1,5-bisphosphate (RuBP), 3-phosphoglycerate (3PG).

206

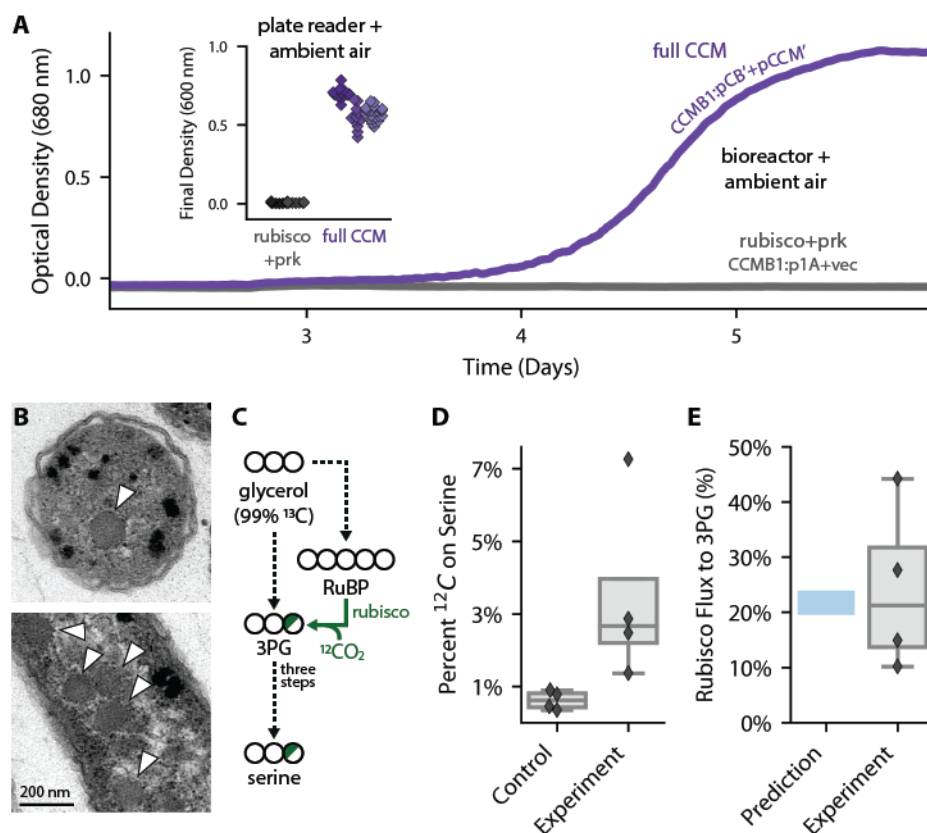

207

208 **Fig. 3. Expression of 20 CCM genes permits growth of CCMB1 in ambient air. (A)**

209 Representative growth curves from a bioreactor bubbling ambient air. CCMB1:pCB' + pCCM'

210 grows well (purple, "full CCM"), while rubisco and prk alone are insufficient for growth in air (grey,

211 CCMB1:p1A+vec). Inset: a plate reader experiment in biological triplicate (different shades)

212 showed the same result (SI). (B) Polyhedral bodies resembling carboxysomes are evident in

213 electron micrographs of CCMB1:pCB'+pCCM' cells grown in air. (C) Cells were grown in ambient

214 air with 99%  $^{13}\text{C}$  glycerol as the sole organic carbon source so that  $^{12}\text{CO}_2$  in air is the sole source

215 of  $^{12}\text{C}$ . As serine is a direct metabolic product of 3PG, we expect  $^{12}\text{C}$  enrichment on serine when

216 rubisco is active. (D) The  $^{12}\text{C}$  composition of serine from CCMB1:pCB' + pCCM' ("Experiment") is

217 roughly threefold above the control. (E) The fraction of 3PG production flux due to rubisco was

218 predicted via Flux Balance Analysis and estimated from isotopic labeling data (Methods).

219 Estimates of the rubisco flux fraction exceed 10% for all four biological replicates and the mean

220 estimate accords well with a  $\approx 20\%$  prediction.

221

## 222 References

- 223 1. J. A. Raven, J. Beardall, P. Sánchez-Baracaldo, *J. Exp. Bot.* **68**, 3701–3716 (2017).
- 224 2. S. G. Wildman, *Photosynth. Res.* **73**, 243–250 (2002).
- 225 3. Y. M. Bar-On, R. Milo, *Proc. Natl. Acad. Sci. U. S. A.* **116**, 4738–4743 (2019).
- 226 4. A. I. Flamholz *et al.*, *Biochemistry.* **58**, 3365–3376 (2019).
- 227 5. G. Bowes, W. L. Ogren, *J. Biol. Chem.* **247**, 2171–2176 (1972).
- 228 6. P. M. Shih *et al.*, *Nat. Commun.* **7**, 10382 (2016).
- 229 7. W. W. Fischer, J. Hemp, J. E. Johnson, *Annu. Rev. Earth Planet. Sci.* **44**, 647–683 (2016).
- 230 8. A. Flamholz, P. M. Shih, *Curr. Biol.* **30**, R490–R494 (2020).
- 231 9. B. D. Rae, B. M. Long, M. R. Badger, G. D. Price, *Microbiol. Mol. Biol. Rev.* **77**, 357–379  
232 (2013).
- 233 10. C. A. Kerfeld, M. R. Melnicki, *Curr. Opin. Plant Biol.* **31**, 66–75 (2016).
- 234 11. J. M. McGrath, S. P. Long, *Plant Physiol.* **164**, 2247–2261 (2014).
- 235 12. N. M. Mangan, A. Flamholz, R. D. Hood, R. Milo, D. F. Savage, *Proc. Natl. Acad. Sci. U. S.*  
236 *A.* **113**, E5354–62 (2016).
- 237 13. M. Ermakova, F. R. Danila, R. T. Furbank, S. von Caemmerer, *Plant J.* **101**, 940–950  
238 (2020).
- 239 14. M. T. Lin, A. Occhialini, P. J. Andralojc, M. A. J. Parry, M. R. Hanson, *Nature.* **513**, 547–550  
240 (2014).
- 241 15. A. Occhialini, M. T. Lin, P. J. Andralojc, M. R. Hanson, M. A. J. Parry, *Plant J.* **85**, 148–160  
242 (2016).
- 243 16. B. M. Long *et al.*, *Nat. Commun.* **9**, 3570 (2018).
- 244 17. D. J. Orr *et al.*, *Plant Physiol.* **182**, 807–818 (2020).
- 245 18. A. Wu, G. L. Hammer, A. Doherty, S. von Caemmerer, G. D. Farquhar, *Nat Plants.* **5**, 380–  
246 388 (2019).
- 247 19. Y. Marcus, R. Schwarz, D. Friedberg, A. Kaplan, *Plant Physiol.* **82**, 610–612 (1986).
- 248 20. G. D. Price, M. R. Badger, *Plant Physiol.* **91**, 514–525 (1989).
- 249 21. F. Cai *et al.*, *PLoS One.* **4**, e7521 (2009).
- 250 22. J. J. Desmarais *et al.*, *Nat Microbiol.* **4**, 2204–2215 (2019).
- 251 23. W. Bonacci *et al.*, *Proc. Natl. Acad. Sci. U. S. A.* **109**, 478–483 (2012).

- 252 24. K. M. Scott *et al.*, *Appl. Environ. Microbiol.* **85**, 1–19 (2019).
- 253 25. N. M. Wheatley, C. D. Sundberg, S. D. Gidaniyan, D. Cascio, T. O. Yeates, *J. Biol. Chem.*  
254 **289**, 7973–7981 (2014).
- 255 26. O. Mueller-Cajar, *Front Mol Biosci.* **4**, 31 (2017).
- 256 27. H. Aigner *et al.*, *Science.* **358**, 1272–1278 (2017).
- 257 28. G. D. Price, M. R. Badger, *Plant Physiol.* **91**, 505–513 (1989).
- 258 29. L. M. Oltrogge *et al.*, *Nat. Struct. Mol. Biol.* **27**, 281–287 (2020).
- 259 30. J. Du, B. Förster, L. Rourke, S. M. Howitt, G. D. Price, *PLoS One.* **9**, e115905 (2014).
- 260

261 **Acknowledgements:** We thank Matt Davis for P1 transduction materials and advice, Hernan  
262 Garcia and Han Lim for supplying pZ plasmids, Maggie Stoeva, Anna Engelbrekton, Anchal  
263 Mehra, Sophia Ewens and Tyler Barnum for help with anaerobic growth, Reena Zalpuri and  
264 Danielle Jorgens at the University of California Berkeley Electron Microscope Laboratory for  
265 advice and assistance with electron microscopy, and Rob Egbert and Adam Arkin for KEIO  
266 strains. We are grateful to Eric Estrin, Woody Fischer, Darcy McRose, Dipti Nayak, Sabeeha  
267 Merchant, Luke Oltrogge, and Naiya Phillips, who gave detailed comments on the manuscript,  
268 and to Dan Arlow, Yinon Bar-On, Dan Davidi, Jack Desmarais, Hernan Garcia, Oliver Mueller-  
269 Cajar, Rob Nichols, Kris Niyogi, Dan Portnoy, Morgan Price, Noam Prywes, Jeremy Roop, Rachel  
270 Shipps, Patrick Shih, and Dan Tawfik, for support, advice and helpful discussions throughout.

271  
272 **Funding:** This work was supported by a National Science Foundation Graduate Research  
273 Fellowship (to A.I.F.), grants from the US Department of Energy (no. DE-SC00016240) and Royal  
274 Dutch Shell (Energy Biosciences Institute project CW163755) to D.F.S., and from the European  
275 Research Council (Project NOVCARBFIX 646827) to R.M. R.M. is the Charles and Louise  
276 Gartner Professional Chair.

277  
278 **Author contributions:** A.I.F. conceived of and designed all experiments with mentorship from  
279 R.M. and D.F.S. and support from all authors. S.A., N.A., E.N., A.B-E. and R.M. designed and  
280 constructed the  $\Delta rpiAB$  strain from which A.I.F., E.J.D, and S.R. constructed CCMB1. A.I.F.,  
281 E.J.D, and S.R. designed and constructed all other strains and plasmids. A.I.F and E.J.D.  
282 performed growth and selection experiments. C.B. performed electron microscopy. S.G. and R.B-  
283 N. performed LC-MS analysis on biomass hydrolysate prepared by A.I.F. and E.J.D. A.I.F., S.G.,  
284 R.B-N., and E.N. analysed isotopic labeling data. A.I.F and E.N. designed and executed Flux  
285 Balance Analysis. A.I.F. wrote the manuscript with input from all authors.

286  
287 **Competing interests:** D.F.S. is a co-founder of Scribe Therapeutics and a scientific advisory  
288 board member of Scribe Therapeutics and Mammoth Biosciences. A.B.-E. is co-founder of b.fab.  
289 These companies were not involved in this research in any way. All other authors declare no  
290 competing interests.

291  
292 **Data and materials availability:** All data associated with this work is available in the main text,  
293 supplementary materials and the repository at <https://github.com/flamholz/carboxecoli>. Plasmids  
294 available on Addgene at [https://www.addgene.org/David\\_Savage/](https://www.addgene.org/David_Savage/), strains distributed on request.
