# 1 **Functional reconstitution of a bacterial CO<sub>2</sub> concentrating mechanism** 2 **in *E. coli***

3 **Authors:** Avi I. Flamholz<sup>1</sup>, Eli Dugan<sup>1</sup>, Cecilia Blikstad<sup>1</sup>, Shmuel Gleizer<sup>2</sup>, Roe Ben-Nissan<sup>2</sup>,  
4 Shira Amram<sup>2</sup>, Niv Antonovsky<sup>2,†</sup>, Sumedha Ravishankar<sup>1,‡</sup>, Elad Noor<sup>2,§</sup>, Arren Bar-Even<sup>3</sup>, Ron  
5 Milo<sup>2,\*</sup> & David F. Savage<sup>1,\*</sup>

## 6 **Affiliations:**

7 <sup>1</sup> Department of Molecular and Cell Biology, University of California, Berkeley, California 94720,  
8 United States

9 <sup>2</sup> Department of Plant and Environmental Sciences, Weizmann Institute of Science, Rehovot  
10 76100, Israel

11 <sup>3</sup> Max Planck Institute of Molecular Plant Physiology, Am Mühlenberg 1, 14476 Potsdam,  
12 Germany

13 <sup>†</sup> Present address: Laboratory of Genetically Encoded Small Molecules, The Rockefeller  
14 University, 1230 York Avenue, New York, NY, 10065, USA

15 <sup>‡</sup> Present address: Division of Biological Sciences, Section of Molecular Biology, University of  
16 California, San Diego, La Jolla, California, 92093, United States.

17 <sup>§</sup> Present address: Institute of Molecular Systems Biology, Eidgenössische Technische  
18 Hochschule Zürich, Zürich CH-8093, Switzerland

19 \*Correspondence to: [ron.milo@weizmann.ac.il](mailto:ron.milo@weizmann.ac.il) (R.M.) and [savage@berkeley.edu](mailto:savage@berkeley.edu) (D.F.S.)  
20  
21

## 22 **Abstract**

23 Many photosynthetic organisms employ a CO<sub>2</sub> concentrating mechanism (CCM) to increase the  
24 rate of CO<sub>2</sub> fixation via the Calvin cycle. CCMs catalyze ≈50% of global photosynthesis, yet it  
25 remains unclear which genes and proteins are required to produce this complex adaptation. We  
26 describe the construction of a functional CCM in a non-native host, achieved by expressing genes  
27 from an autotrophic bacterium in an engineered *E. coli* strain. Expression of 20 CCM genes  
28 enabled *E. coli* to grow by fixing CO<sub>2</sub> from ambient air into biomass, with growth depending on  
29 CCM components. Bacterial CCMs are therefore genetically compact and readily transplanted,  
30 rationalizing their presence in diverse bacteria. Reconstitution enabled genetic experiments  
31 refining our understanding of the CCM, thereby laying the groundwork for deeper study and  
32 engineering of the cell biology supporting CO<sub>2</sub> assimilation in diverse organisms.

## 33 **One Sentence Summary**

34 A bacterial CO<sub>2</sub> concentrating mechanism enables *E. coli* to fix CO<sub>2</sub> from ambient air.

## 35 Introduction

36 Nearly all carbon in the biosphere enters by CO<sub>2</sub> fixation in the Calvin-Benson-Bassham cycle  
37 (Raven et al., 2017). Ribulose Biphosphate Carboxylase/Oxygenase - commonly known as  
38 rubisco - is the CO<sub>2</sub> fixing enzyme in this cycle (Wildman, 2002) and likely the most abundant  
39 enzyme on Earth (Bar-On and Milo, 2019). As rubisco is abundant and central to biology, one  
40 might expect it to be an exceptional catalyst, but it is not. Photosynthetic rubiscos are modest  
41 enzymes, with carboxylation turnover numbers ( $k_{cat}$ ) ranging from 1-10 s<sup>-1</sup> (Flamholz et al., 2019;  
42 Iñiguez et al., 2020). Moreover, all known rubiscos catalyze a competing oxygenation of the five-  
43 carbon organic substrate, ribulose 1,5-biphosphate (Bowes and Ogren, 1972; Cleland et al.,  
44 1998; Flamholz et al., 2019).

45  
46 Rubisco arose > 2.5 billion years ago, when Earth's atmosphere contained little O<sub>2</sub> and abundant  
47 CO<sub>2</sub> (Fischer et al., 2016; Shih et al., 2016). In this environment, rubisco's eponymous oxygenase  
48 activity could not have hindered carbon fixation or the growth of CO<sub>2</sub>-fixing organisms. Present-  
49 day atmosphere, however, poses a problem for plants and other autotrophs: their primary carbon  
50 source, CO<sub>2</sub>, is relatively scarce (≈0.04%) while a potent competing substrate, O<sub>2</sub>, is abundant  
51 (≈21%).

52  
53 CO<sub>2</sub> concentrating mechanisms (CCMs) arose multiple times over the last 2 billion years  
54 (Flamholz and Shih, 2020; Raven et al., 2017) and overcome this problem by concentrating CO<sub>2</sub>  
55 near rubisco (Figure 1A). In elevated CO<sub>2</sub> environments most active sites are occupied with CO<sub>2</sub>  
56 and not O<sub>2</sub>. As such, high CO<sub>2</sub> increases the rate of carboxylation and competitively inhibits  
57 oxygenation (Bowes and Ogren, 1972) thereby improving overall carbon assimilation (Figure 1B).  
58 Today, at least four varieties of CCMs are found in plants, algae and bacteria (Flamholz and Shih,  
59 2020; Raven et al., 2017), organisms with CCMs are collectively responsible for ≈50% of global  
60 net photosynthesis (Raven et al., 2017), and some of the most productive human crops (e.g.  
61 maize and sugarcane) rely on CCMs.

62  
63 CCMs are particularly common among autotrophic bacteria: all Cyanobacteria and many  
64 Proteobacteria have CCM genes (Kerfeld and Melnicki, 2016; Rae et al., 2013). Bacterial CCMs  
65 rely on two crucial features: (i) energy-coupled inorganic carbon uptake at the cell membrane and  
66 (ii) a 200+ MDa protein organelle called the carboxysome that encapsulates rubisco with a  
67 carbonic anhydrase enzyme (Mangan et al., 2016; McGrath and Long, 2014). In the prevailing  
68 model of the carboxysome CCM, inorganic carbon uptake produces a high, above-equilibrium  
69 cytosolic HCO<sub>3</sub><sup>-</sup> concentration (≈30 mM) that diffuses into the carboxysome, where carbonic  
70 anhydrase activity produces a high carboxysomal CO<sub>2</sub> concentration that promotes efficient  
71 carboxylation by rubisco (Figure 1A-B).

72  
73 As CCMs accelerate CO<sub>2</sub> fixation, there is great interest in transplanting them into crops  
74 (Ermakova et al., 2020; McGrath and Long, 2014). Carboxysome-based CCMs are especially  
75 attractive because they natively function in single cells and appear to rely on a tractable number  
76 of genes (Lin et al., 2014; Long et al., 2018; Occhialini et al., 2016; Orr et al., 2020). Modeling  
77 suggests that introducing bacterial CCM components could improve plant photosynthesis

78 (McGrath and Long, 2014), especially if aspects of plant physiology can be modulated via genetic  
 79 engineering (Wu et al., 2019). However, expressing bacterial rubiscos and carboxysome  
 80 components has, so far, uniformly resulted in transgenic plants displaying impaired growth (Lin et  
 81 al., 2014; Long et al., 2018; Occhialini et al., 2016; Orr et al., 2020). More generally, as our  
 82 understanding of the genes and proteins participating in the carboxysome CCM rests mostly on  
 83 loss-of-function genetic experiments in native hosts (Cai et al., 2009; Desmarais et al., 2019;  
 84 Marcus et al., 1986; Price and Badger, 1989a), it is possible that some genetic, biochemical and  
 85 physiological aspects of CCM function remain unappreciated. We therefore sought to test whether  
 86 current understanding is sufficient to reconstitute the bacterial CCM in a non-native bacterial host,  
 87 namely *E. coli*.  
 88

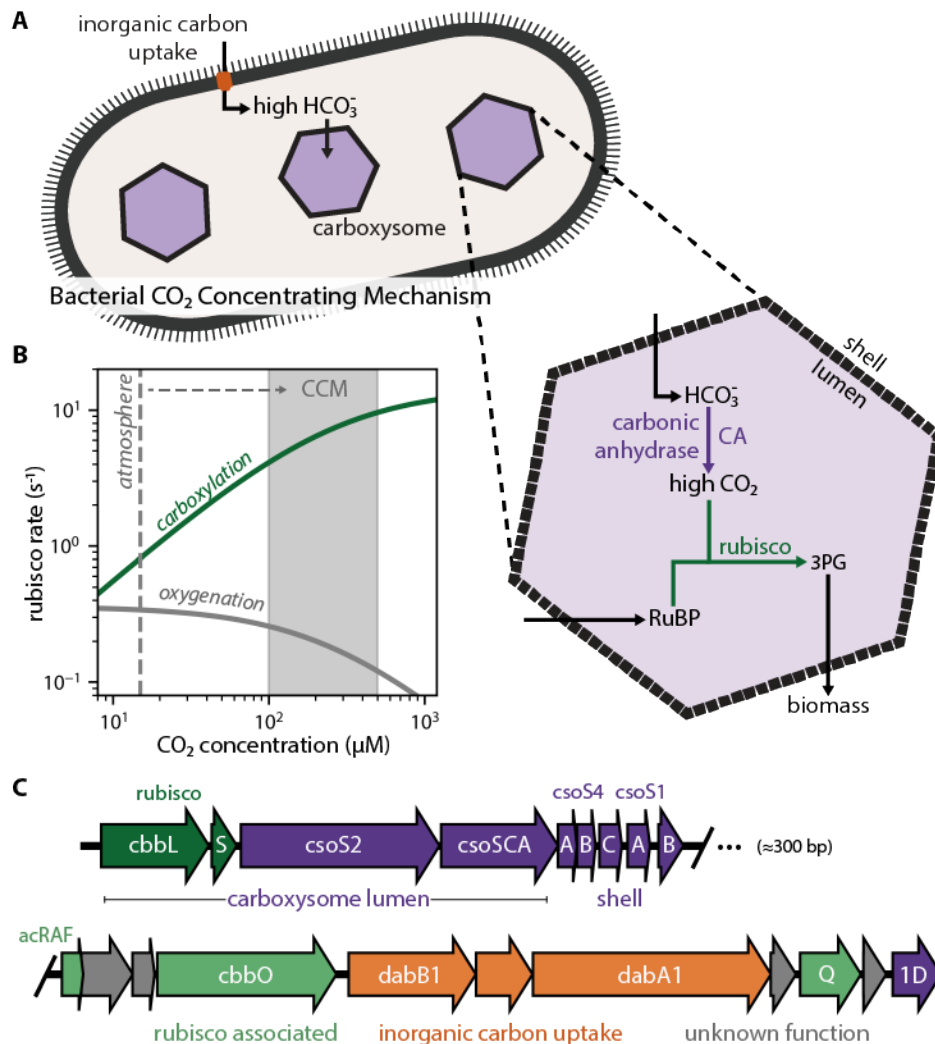

89 **Figure 1. Twenty genes form the basis of a bacterial CCM.** (A) The bacterial CCM consists of at least two essential  
 90 components - energy-coupled carbon uptake and carboxysome structures that encapsulate rubisco with a carbonic  
 91 anhydrase (CA) enzyme (Mangan et al., 2016; McGrath and Long, 2014). Transport generates a large cytosolic  $\text{HCO}_3^-$   
 92 pool, which is rapidly converted to high carboxysomal  $\text{CO}_2$  concentration by the carboxysomal CA. (B) Elevated  $\text{CO}_2$   
 93 increases the rubisco carboxylation rate (green) and suppresses oxygenation by competitive inhibition (grey).  $[\text{O}_2]$  was  
 94 set to  $270 \mu\text{M}$  for rate calculations. (C) *H. neapolitanus* CCM genes are mostly contained in a 20 gene cluster  
 95

96 (Desmarais et al., 2019) expressing rubisco and its associated chaperones (green), carboxysome structural proteins  
 97 (purple), and an inorganic carbon transporter (orange).

98  
 99 Using a genome-wide screen in the CO<sub>2</sub>-fixing proteobacterium *H. neapolitanus*, we recently  
 100 demonstrated that a 20-gene cluster encodes all activities required for the CCM, at least in  
 101 principle (Desmarais et al., 2019). These genes include rubisco large and small subunits, the  
 102 carboxysomal carbonic anhydrase, seven structural proteins of the α-carboxysome (Bonacci et  
 103 al., 2012), an energy-coupled inorganic carbon transporter (Desmarais et al., 2019; Scott et al.,  
 104 2019), three rubisco chaperones (Aigner et al., 2017; Mueller-Cajar, 2017; Wheatley et al., 2014),  
 105 and four genes of unknown function (Figure 1C). We aimed to test whether these genes are  
 106 sufficient to establish a functioning CCM in *E. coli*.

107  
 108 **Figure 2. CCMB1 depends on rubisco carboxylation for growth on glycerol.**

109 **(A)** Ribose-5-phosphate (Ri5P) is required for nucleotide biosynthesis. Deletion of ribose-phosphate  
 110 isomerase ( $\Delta rpi$ ) in CCMB1 blocks ribulose-5-phosphate (Ru5P) metabolism in the pentose  
 111 phosphate (PP) pathway. Expression of rubisco (*H. neapolitanus cbbLS*) and phosphoribulokinase (*S.*  
 112 *elongatus* PCC7942 *prk*) on the p1A plasmid **(B)** permits Ru5P metabolism, thus enabling growth  
 113 on M9 glycerol media in 10% CO<sub>2</sub> **(C)**. Mutating the rubisco active site (p1A *cbbL*<sup>-</sup>) abrogates growth,  
 114 as does mutating ATP-binding residues of *prk* (p1A *prk*<sup>-</sup>). **(D)** CCMB1:p1A grows well under 10% CO<sub>2</sub>,  
 115 but fails to grow in ambient air. Cells grown on M9 glycerol media throughout. The algorithmic design  
 116 of CCMB1 is described in figure supplement 1 and the mechanism of rubisco-dependence is  
 117 diagrammed in figure supplement 2. Figure supplement 3 shows CCMB1:p1A growth  
 118 phenotypes on various media and figure supplement 4 demonstrates that rubisco  
 119 oxygenation is not required for growth by demonstrating growth in the absence of O<sub>2</sub>.  
 120 Acronyms: ribulose 1,5-bisphosphate (RuBP), 3-phosphoglycerate (3PG).

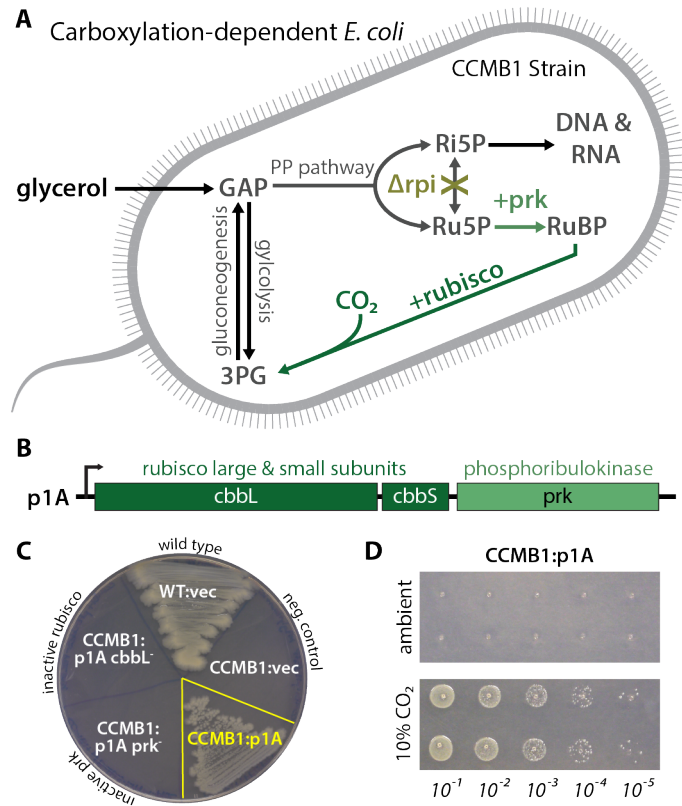

## 134 Results

135 As *E. coli* is a heterotroph, consuming organic carbon molecules to produce energy and biomass,  
 136 it does not natively rely on rubisco. Therefore, in order to evaluate the effect of heterologous CCM  
 137 expression, we first designed an *E. coli* strain that depends on rubisco carboxylation for growth.  
 138 To grow on glycerol as the sole carbon source, *E. coli* must synthesize ribose 5-phosphate (Ri5P)  
 139 for nucleic acids. Synthesis of Ri5P via the pentose phosphate pathway forces co-production of  
 140 ribulose 5-phosphate (Ru5P). Deletion of ribose 5-phosphate isomerase (*rpiAB* genes, denoted  
 141  $\Delta rpi$ ), however, makes Ru5P a metabolic “dead-end” (Figure 2A). Expression of  
 142 phosphoribulokinase (*prk*) and rubisco creates a “detour” pathway converting Ru5P and CO<sub>2</sub> into

143 two units of the central metabolite 3-phosphoglycerate (3PG), enabling Ru5P metabolism and  
144 growth (Figure 2A). Additionally, cytosolic carbonic anhydrase activity is incompatible with the  
145 bacterial CCM (Price and Badger, 1989b). We therefore constructed a strain, named CCMB1 for  
146 “CCM Background 1”, lacking *rpiAB* and all endogenous carbonic anhydrases (Methods).

147

148 As predicted, CCMB1 required rubisco and *prk* for growth on glycerol minimal media in 10% CO<sub>2</sub>  
149 (Figures 2B-C). When expressing rubisco and *prk* on the p1A plasmid (Figure 2B), CCMB1 also  
150 grew reproducibly in an anoxic mix of 10:90 CO<sub>2</sub>:N<sub>2</sub> (Figure 2 - figure supplement 4) implying that  
151 rubisco carboxylation is sufficient for growth on glycerol media and rubisco-catalyzed oxygenation  
152 of RuBP is not required. CCMB1:p1A failed to grow on glycerol media in ambient air, however,  
153 presumably due to insufficient carboxylation at low CO<sub>2</sub> (Figure 2D). That is, CCMB1:p1A displays  
154 the “high-CO<sub>2</sub> requiring” phenotype that is the hallmark of CCM mutants (Marcus et al., 1986;  
155 Price and Badger, 1989a).

156

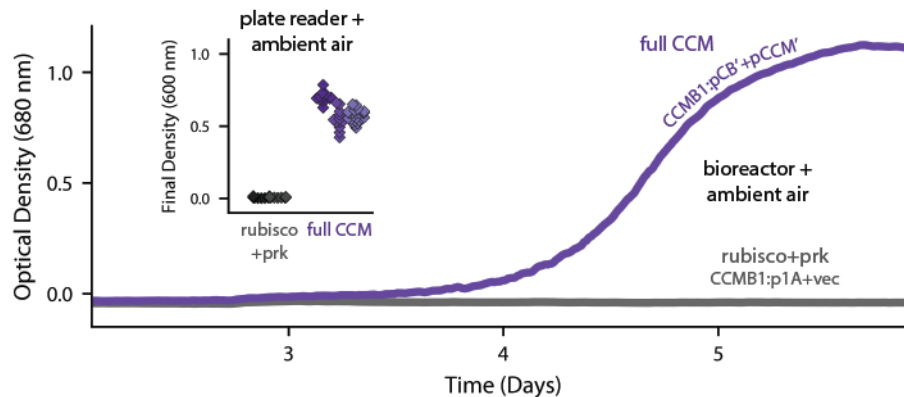

157

158 **Figure 3. Expression of 20 CCM genes permits growth of CCMB1 in ambient air.** Time course data give  
159 representative growth curves from a bioreactor bubbling ambient air. CCMB1:pCB' + pCCM' grows well (purple, “full  
160 CCM”), while rubisco and *prk* alone are insufficient for growth in ambient air (grey, CCMB1:p1A+vec). Inset: a plate  
161 reader experiment in biological triplicate (different shades) gave the same result. Expressing the full complement of  
162 CCM genes led to an increase in culture density (optical density at 600 nm) of ≈0.6 units after 80 hours of cultivation.  
163 Bootstrapping was used to calculate a 99.9% confidence interval of 0.56-0.64 OD units for the effect of expressing the  
164 full CCM during growth in ambient air. Figure supplement 1 shows triplicate growth curves and evaluates statistical  
165 significance.

166

167 We expected that expressing a functional CO<sub>2</sub>-concentrating mechanism would cure CCMB1 of  
168 its high-CO<sub>2</sub> requirement and permit growth in ambient air. We therefore generated two plasmids,  
169 pCB and pCCM, that together express all 20 genes from the *H. neapolitanus* CCM cluster (Figure  
170 1C). pCB encodes ten carboxysome genes (Bonacci et al., 2012), including rubisco large and  
171 small subunits, along with *prk*. The remaining *H. neapolitanus* genes, including putative rubisco  
172 chaperones (Aigner et al., 2017; Mueller-Cajar, 2017; Wheatley et al., 2014) and an inorganic  
173 carbon transporter (Desmarais et al., 2019; Scott et al., 2019), were cloned into the second  
174 plasmid, pCCM.

175

176 CCMB1 co-transformed with pCB and pCCM initially failed to grow on glycerol media in ambient  
177 air. We therefore conducted selection experiments, described fully in Figure S5, that resulted in



178 the isolation of mutant plasmids conferring growth in ambient air. Briefly, CCMB1:pCB + pCCM  
 179 cultures were grown to saturation in 10% CO<sub>2</sub>. These cultures were washed and plated on glycerol  
 180 minimal media (Methods). Colonies became visible after 20 days of incubation in ambient air  
 181 (Figure S5). Deep-sequencing of plasmid DNA revealed mutations in regulatory sequences (e.g.  
 182 a promoter and transcriptional repressor) but none in sequences coding for CCM components  
 183 (Table S4). Individual post-selection plasmids pCB' and pCCM' were reconstructed by PCR,  
 184 resequenced, and transformed into naive CCMB1 (Methods). As shown in Figure 3, pCB' and  
 185 pCCM' together enabled reproducible growth of CCMB1 in ambient air, suggesting that the 20  
 186 genes expressed are sufficient to produce a heterologous CCM without any genomic mutations.  
 187

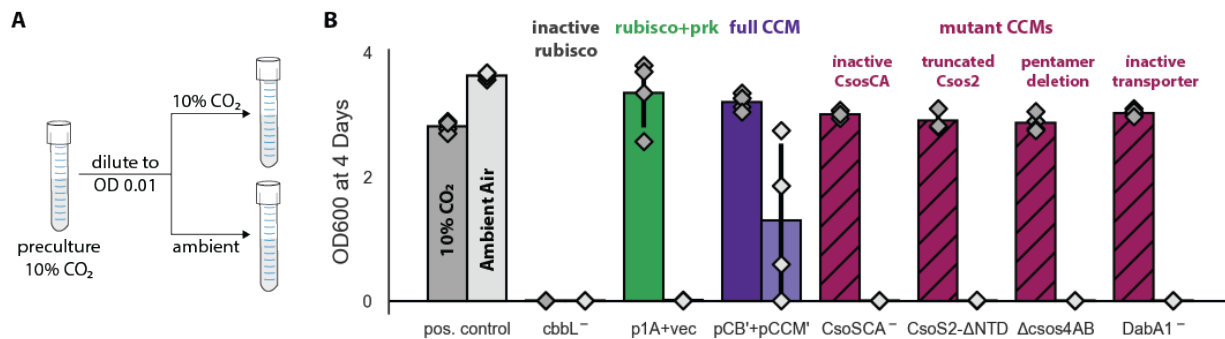

188  
 189 **Figure 4. Growth in ambient air depends on the known components of the bacterial CCM.** We generated plasmid  
 190 variants carrying inactivating mutations to known components of the CCM. (A) Pre-cultures were grown in 10% CO<sub>2</sub>  
 191 and diluted into two tubes, one of which was cultured in 10% CO<sub>2</sub> and the other in ambient air (Methods). Strains were  
 192 tested in biological quadruplicate and culture density was measured after four days. (B) Targeted mutations to CCM  
 193 components ablated growth in ambient air while permitting growth in 10% CO<sub>2</sub>, as expected. The left bar (darker color)  
 194 gives the mean endpoint density in 10% CO<sub>2</sub> for each strain. The right bar (lighter color) gives the mean in ambient air.  
 195 Error bars give the standard deviation. From left to right: a positive control (grey) grew in 10% CO<sub>2</sub> and ambient air,  
 196 while a negative control CCMB1 strain carrying catalytically inactive rubisco (CCMB1:pCB' cbbL<sup>-</sup>+pCCM') failed to grow  
 197 in either condition; CCMB1 expressing rubisco and prk but no CCM genes (green, CCMB1:p1A+vec) grew only in 10%  
 198 CO<sub>2</sub>; CCMB1:pCB'+pCCM' grew in 10% CO<sub>2</sub> and ambient air, recapitulating results presented in Figure 3. The following  
 199 four pairs of maroon bars give growth data for strains carrying targeted mutations to CCM genes: an inactivating  
 200 mutation to carboxysomal carbonic anhydrase (CCMB1:pCB' CsoSCA<sup>-</sup>+pCCM'), deletion of the CsoS2 N-terminus  
 201 responsible for recruiting rubisco to the carboxysome (CCMB1:pCB' CsoS2 ΔNTD +pCCM'), deletion of pentameric  
 202 vertex proteins (CCMB1:pCB' ΔcsoS4AB + pCCM'), and inactivating mutations to the DAB carbon uptake system  
 203 (CCMB1:pCB' DabA1<sup>-</sup> + pCCM'). All four CCM mutations abrogated growth in air while permitting growth in 10% CO<sub>2</sub>.  
 204 The positive control is the CAfree strain expressing human carbonic anhydrase II (Methods). Figure supplement 1  
 205 describes additional controls, statistical analyses, and a longer timescale replicate experiment (12 days) that  
 206 additionally tests the contribution of rubisco chaperones to the CCM. Detailed description of all plasmid and mutation  
 207 abbreviations is given in Table S2.

208  
 209 To verify that growth in ambient air depends on the CCM, we generated plasmids carrying  
 210 targeted mutations to known CCM components (Figure 4). An inactivating mutation to the  
 211 carboxysomal rubisco (CbbL K194M) prohibited growth entirely. Mutations targeting the CCM,  
 212 rather than rubisco itself, should ablate growth in ambient air while permitting growth in high CO<sub>2</sub>  
 213 (Desmarais et al., 2019; Mangan et al., 2016; Marcus et al., 1986; Price and Badger, 1989a; Rae  
 214 et al., 2013). Consistent with this understanding, an inactive mutant of the carboxysomal carbonic  
 215 anhydrase (CsoSCA C173S) required high-CO<sub>2</sub> for growth. Similarly, disruption of carboxysome  
 216 formation by removal of the pentameric shell proteins or the N-terminal domain of CsoS2 also

217 eliminated growth in ambient air. Removing the pentameric proteins CsoS4AB disrupts the  
218 permeability barrier at the carboxysome shell (Cai et al., 2009), while truncating CsoS2 prohibits  
219 carboxysome formation entirely (Oltrogge et al., 2020). Finally, an inactivating mutation to the  
220 inorganic carbon transporter also eliminated growth in ambient air (Desmarais et al., 2019).  
221

222 These experiments demonstrate that pCB' and pCCM' enable CCMB1 to grow in ambient air in a  
223 manner that depends on the known components of the bacterial CCM. To confirm that these cells  
224 produce carboxysome structures, we performed thin section electron microscopy. Regular  
225 polyhedral inclusions of  $\approx 100$  nm diameter were visible in micrographs (Figure 5A), implying  
226 production of morphologically-normal carboxysomes.  
227

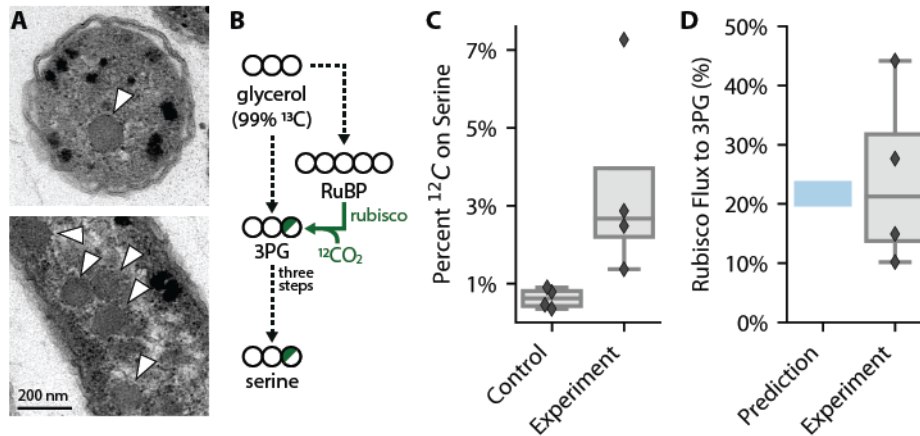

228  
229 **Figure 5. CCMB1:pCB'+pCCM' produces morphologically normal carboxysomes and fixes CO<sub>2</sub> from ambient**  
230 **air into biomass. (A)** Polyhedral bodies resembling carboxysomes are evident in electron micrographs of  
231 CCMB1:pCB'+pCCM' cells grown in air. Figure supplement 1 shows images of control strains. (B) Biological replicate  
232 cultures were grown in ambient air with 99% <sup>13</sup>C glycerol as the sole organic carbon source so that <sup>12</sup>CO<sub>2</sub> in air is the  
233 sole source of <sup>12</sup>C. As serine is a direct metabolic product of 3PG, we expect <sup>12</sup>C enrichment on serine when rubisco  
234 is active. 3PG also derives from glycolytic metabolism of glycerol, so complete <sup>12</sup>C labeling of serine was not expected.  
235 (C) The <sup>12</sup>C composition of serine from CCMB1:pCB' + pCCM' ("Experiment") is roughly threefold above the control.  
236 Figure supplement 2 gives <sup>12</sup>C composition of all measured amino acids. (D) The fraction of 3PG production flux due  
237 to rubisco was predicted via Flux Balance Analysis and estimated from isotopic labeling data (Methods). Estimates of  
238 the rubisco flux fraction exceed 10% for all four biological replicates and the mean estimate accords well with a  $\approx 20\%$   
239 prediction. Figure supplement 3 details the flux calculation procedure.  
240

241 We next conducted isotopic labeling experiments to determine whether CCMB1:pCB' + pCCM'  
242 fixes CO<sub>2</sub> from ambient air into biomass. Cells were grown in minimal media with <sup>13</sup>C-labeled  
243 glycerol as the sole organic carbon source, such that CO<sub>2</sub> from ambient air was the dominant  
244 source of <sup>12</sup>C. The isotopic composition of amino acids in total biomass hydrolysate was analyzed  
245 via mass spectrometry (Methods). Serine is a useful sentinel of rubisco activity because *E. coli*  
246 produces serine from the rubisco product 3PG (Stauffer, 2004; Szyperski, 1995). 3PG is also an  
247 intermediate of lower glycolysis (Bar-Even et al., 2012), and so the degree of <sup>12</sup>C labeling on  
248 serine reports on the balance of fluxes through rubisco and lower glycolysis (Figure 5B). We  
249 therefore expected excess <sup>12</sup>C labeling of serine when rubisco is active. Consistent with this  
250 expectation, serine from CCMB1:pCB'+pCCM' cells contained roughly threefold more <sup>12</sup>C than  
251 the rubisco-independent control (Figure 5C). We estimated the contribution of rubisco to 3PG

252 synthesis *in vivo* by comparing labeling patterns between the rubisco-dependent experimental  
253 cultures and controls (Methods). Based on these estimates, rubisco carboxylation was  
254 responsible for at least 10% of 3PG synthesis in all four biological replicates (Figure 5D, Methods),  
255 confirming fixation of CO<sub>2</sub> from ambient air. As such, this work represents the first functional  
256 reconstitution of any CCM.

257  
258 Reconstitution in *E. coli* enabled us to investigate which *H. neapolitanus* genes are necessary for  
259 CCM function in the absence of any regulation or genetic redundancy (i.e. genes with overlapping  
260 function) present in the native host. We focused on genes involved in rubisco proteostasis and  
261 generated plasmids lacking acRAF, a putative rubisco chaperone, or carrying targeted mutations  
262 to CbbQ, an ATPase involved in activating rubisco catalysis (Aigner et al., 2017; Mueller-Cajar,  
263 2017; Wheatley et al., 2014). Although *acRAF* deletion had a large negative effect in *H.*  
264 *neapolitanus* (Desmarais et al., 2019), neither *acRAF* nor CbbQ were strictly required for CCMB1  
265 to grow in ambient air. Consistent with our screen in the native host (Desmarais et al., 2019),  
266 however, *acRAF* deletion produced a substantial growth defect (Figure 4 - figure supplement 1,  
267 panel C), suggesting that the rate of rubisco complex assembly is an important determinant of  
268 carboxysome biogenesis.

## 269 Discussion

270 Today, CCMs catalyze about half of global photosynthesis (Raven et al., 2017), but this was not  
271 always so. Land plant CCMs, for example, arose only in the last 100 million years (Flamholz and  
272 Shih, 2020; Raven et al., 2017; Sage et al., 2012). Though all contemporary Cyanobacteria have  
273 CCM genes, these CCMs are found in two convergently-evolved varieties (Flamholz and Shih,  
274 2020; Kerfeld and Melnicki, 2016; Rae et al., 2013), suggesting that the ancestor of present-day  
275 Cyanobacteria and chloroplasts did not have a CCM (Rae et al., 2013). So how did carboxysome  
276 CCMs come to dominate the cyanobacterial phylum?

277  
278 Here we demonstrated that the  $\alpha$ -carboxysome CCM from *H. neapolitanus* is readily transferred  
279 between species and confers a large growth benefit, which can explain how these CCMs became  
280 so widespread among bacteria (Kerfeld and Melnicki, 2016; Rae et al., 2013). We constructed a  
281 CCM by expressing 20 genes in an engineered *E. coli* strain, CCMB1. In accordance with its role  
282 in native autotrophic hosts (Desmarais et al., 2019; Long et al., 2018; Marcus et al., 1986; Price  
283 and Badger, 1989a), the transplanted CCM required  $\alpha$ -carboxysomes and inorganic carbon  
284 uptake to enable CCMB1 to grow by fixing CO<sub>2</sub> from ambient air (Figures 3-5, S6-8). These results  
285 conclusively demonstrate that at most 20 gene products are required to produce a bacterial CCM.  
286 The  $\alpha$ -carboxysome CCM is apparently genetically compact and “portable” between organisms.  
287 It is possible, therefore, that expressing bacterial CCMs in non-native autotrophic hosts will  
288 improve CO<sub>2</sub> assimilation and growth. This is a promising approach to improving plant growth  
289 characteristics (Ermakova et al., 2020; Long et al., 2016; Wu et al., 2019) and also engineering  
290 enhanced microbial production of fuel, food products and commodity chemicals from CO<sub>2</sub>  
291 (Claassens et al., 2016; Gleizer et al., 2019).

292



293 Reconstitution also enabled us to test, via simple genetic experiments, whether particular genes  
294 play a role in the CCM (Figure 4 - figure supplement 1). These experiments demonstrated that  
295 the rubisco chaperones are strictly dispensable for producing a functional bacterial CCM, though  
296 removing the *acRAF* gene produced a substantial growth defect that warrants further  
297 investigation. Further such can use our reconstituted CCM to delineate a minimal reconstitution  
298 of the bacterial CCM suitable for plant expression (Du et al., 2014; Long et al., 2018, 2016;  
299 Occhialini et al., 2016; Orr et al., 2020), test hypotheses about carboxysome biogenesis (Bonacci  
300 et al., 2012; Oltrogge et al., 2020), and probe the relationship between CCMs and host physiology  
301 (Mangan et al., 2016; Price and Badger, 1989b).

302

303 Our approach to studying CCMs by reconstitution in tractable non-native hosts can be applied to  
304 other CCMs, including  $\beta$ -carboxysome CCMs, the algal pyrenoid, and plausible evolutionary  
305 ancestors thereof (Flamholz and Shih, 2020). Historical trends in atmospheric CO<sub>2</sub> likely promoted  
306 the evolution of CCMs (Fischer et al., 2016; Flamholz and Shih, 2020), so testing the growth of  
307 plausible ancestors of bacterial CCMs (e.g. carboxysomes lacking carbonic anhydrase activity)  
308 may provide insight into paths of CCM evolution and the composition of the ancient atmosphere  
309 at the time bacterial CCMs arose. In response to these same pressures, diverse eukaryotic algae  
310 evolved CCMs relying on micron-sized rubisco aggregates called the pyrenoids (Flamholz and  
311 Shih, 2020; Wang and Jonikas, 2020). Pyrenoid CCMs are collectively responsible for perhaps  
312 80% of oceanic photosynthesis (Mackinder et al., 2016), yet many fundamental questions remain  
313 regarding the composition and operation of algal CCMs (Wang and Jonikas, 2020). Functional  
314 reconstitution of a pyrenoid CCM is a worthy goal which, once achieved, will indicate enormous  
315 progress in our collective understanding of the genetics, cell biology, biochemistry and physical  
316 processes supporting the eukaryotic complement of oceanic photosynthesis. We hope such  
317 studies will further our principled understanding of, and capacity to engineer, the cell biology  
318 supporting CO<sub>2</sub> fixation in diverse organisms.

319

320

## 321 Materials and Methods

### 322 Growth conditions

323 Unless otherwise noted, cells were grown on M9 minimal media supplemented with 0.4% w/v  
324 glycerol, 0.5 ppm thiamin ( $10^4$  dilution of 0.5% w/v stock) and a trace element mix. The trace  
325 element mix components and their final concentrations in M9 media are: 50 mg/L EDTA, 31 mM  
326  $\text{FeCl}_3$ , 6.2 mM  $\text{ZnCl}_2$ , 0.76 mM  $\text{CuSO}_4 \cdot 5\text{H}_2\text{O}$ , 0.42 mM  $\text{CoCl}_2 \cdot 6\text{H}_2\text{O}$ , 1.62 mM  $\text{H}_3\text{BO}_3$ , 81 nM  
327  $\text{MnCl}_2 \cdot 4\text{H}_2\text{O}$ . 100 nM anhydrotetracycline (aTc) was used in induced cultures. For routine cloning,  
328 25 mg/L chloramphenicol and 60 mg/L kanamycin selection were used as appropriate. Antibiotics  
329 were reduced to half concentration (12.5 and 30 mg/L, respectively) for CCMB1 growth  
330 experiments and kanamycin was omitted when evaluating rubisco-dependence of growth as pF  
331 plasmids carrying kanamycin resistance also express rubisco. Culture densities were measured  
332 at 600 nm in a table top spectrophotometer (Genesys 20, Thermo Scientific) and turbid cultures  
333 were measured in five or tenfold dilution as appropriate in order to reach the linear regime of the  
334 spectrophotometer.

335  
336 Agar plates were incubated at 37 °C in defined  $\text{CO}_2$  pressures in a  $\text{CO}_2$  controlled incubator (S41i,  
337 New Brunswick). For experiments in which a frozen bacterial stock was used to inoculate the  
338 culture, cells were first streaked on agar plates and incubated at 10%  $\text{CO}_2$  to facilitate fast growth.  
339 Pre-cultures derived from colonies were grown in 2-5 mL liquid M9 glycerol media under 10%  
340  $\text{CO}_2$  with a matching 1 mL control in ambient air. Negative control strains unable to grow in  
341 minimal media (i.e. active site mutants of rubisco) were streaked on and pre-cultured in LB media  
342 under 10%  $\text{CO}_2$ .

343  
344 Growth curves were obtained using two complementary methods: an 8-chamber bioreactor for  
345 large-volume cultivation (MC1000, PSI), and 96-well plates in a gas controlled plate reader plate  
346 (Spark, Tecan). For the 96-well format, cells were pre-cultured in the appropriate permissive  
347 media, M9 glycerol under 10%  $\text{CO}_2$  where possible. If rich media was used, e.g. for negative  
348 controls, stationary phase cells were washed in 2x the culture volume and resuspended in 1x  
349 culture volume of M9 with no carbon source. Cultures were diluted to an OD of 1.0 (600 nm) and  
350 250  $\mu\text{l}$  cultures were inoculated by adding 5  $\mu\text{l}$  of cells to 245  $\mu\text{l}$  media. A humidity cassette  
351 (Tecan) was refilled daily with distilled water to mitigate evaporation during multi-day cultivation  
352 at 37 °C. Evaporation nonetheless produced irregular growth curves (e.g. Figure 2 - figure  
353 supplement 3), which motivated larger volume cultivation in the bioreactor, which mixes by  
354 bubbling ambient air into each growth vessel. 80 ml bioreactor cultures were inoculated to a  
355 starting OD of 0.005 (600 nm) and grown at 37 °C to saturation. Optical density was monitored  
356 continuously at 680 nm.

357  
358 Anaerobic cultivation of agar plates was accomplished using a BBL GasPak 150 jar (BD) flushed  
359 6 times with an anoxic mix of 10%  $\text{CO}_2$  and 90%  $\text{N}_2$ . Tenfold titers of biological duplicate cultures  
360 were plated on M9 glycerol media with and without 20 mM  $\text{NaNO}_3$  supplementation. Because *E.*  
361 *coli* cannot ferment glycerol,  $\text{NO}_3^-$  was supplied as an alternative electron acceptor. Plates without

362 NO<sub>3</sub><sup>-</sup> showed no growth (Figure 2 - figure supplement 4), confirming the presence of an anaerobic  
363 atmosphere in the GasPak.

## 364 Computational design of rubisco-dependent strains

365 To computationally design mutant strains in which growth is coupled to rubisco carboxylation flux,  
366 we used a variant of Flux Balance Analysis (Lewis et al., 2012) called “OptSlope” (Antonovsky et  
367 al., 2016). Starting from a published model of *E. coli* central metabolism, the Core *Escherichia*  
368 *coli* Metabolic Model (Orth et al., 2010), we considered all pairs of central metabolic knockouts  
369 and ignored those that permit growth *in silico* in the absence of rubisco and phosphoribulokinase  
370 (Prk) activities. For the remaining knockouts, we evaluated the degree of coupling between  
371 rubisco flux and biomass production during growth in nine carbon sources: glucose, fructose,  
372 gluconate, ribose, succinate, xylose, glycerate, acetate and glycerol. This approach highlighted  
373 several candidate rubisco-dependent knockout strains, including  $\Delta rpiAB \Delta edd$ . OptSlope  
374 predicted rubisco-dependent growth of  $\Delta rpiAB \Delta edd$  strains on glucose, fructose, succinate,  
375 acetate, glycerate, xylose and gluconate. The OptSlope algorithm is outlined in Figure 2 - figure  
376 supplement 1 and described fully in (Antonovsky et al., 2016). Proposed mechanisms of rubisco-  
377 dependence are outlined in Figure 2 - figure supplement 2. OptSlope source code is available at  
378 <https://gitlab.com/elad.noor/optslope> and calculations specific to CCMB1 can be found at  
379 <https://github.com/flamholz/carboxecoli>.

## 380 Genomic modifications producing the CCMB1 strain

381 Strains used in this study are documented in Table S1. To produce CCMB1, we first constructed  
382 a strain termed “ $\Delta rpiAB$ ” for short. This strain has the genotype  $\Delta rpiAB \Delta edd$  and was constructed  
383 in the *E. coli* BW25113 background by repeated rounds of P1 transduction from the KEIO  
384 collection followed by pCP20 curing of the kanamycin selection marker (Baba et al., 2006;  
385 Datsenko and Wanner, 2000). Deletion of *edd* removes the Entner-Doudoroff pathway (Peekhaus  
386 and Conway, 1998), forcing rubisco-dependent metabolism of gluconate via the pentose  
387 phosphate pathway (Figure 2 - figure supplement 2). CCMB1 has the genotype BW25113  $\Delta rpiAB$   
388  $\Delta edd \Delta cynT \Delta can$  and was constructed from  $\Delta rpiAB$  by deleting both native carbonic anhydrases  
389 using the same methods, first transducing the KEIO  $\Delta cynT$  and then  $\Delta can$  from EDCM636 (Merlin  
390 and Masters, 2003), which was obtained from the Yale Coli Genetic Stock Center. Transformation  
391 was performed by electroporation (ECM 630, Harvard Biosciences) and electrocompetent stocks  
392 were prepared using standard protocols. Strain genotypes were verified by PCR, as described  
393 below.

394  
395 Plants, cyanobacteria and other autotrophs uniformly express “photorespiratory” pathways to  
396 process the rubisco oxygenation product 2-phosphoglycolate, or 2PG (Eisenhut et al., 2008). The  
397 *E. coli* genome encodes enzymes that could plausibly serve as a photorespiratory pathway  
398 (Figure 2 - figure supplement 2). We attempted to delete the *gph* gene in CCMB1 as it encodes  
399 the 2PG phosphatase that catalyzes the first step of this putative pathway. However, the  $\Delta gph$   
400 knockout was challenging to transform by electroporation, consistent with a proposed role in DNA  
401 repair (Pellicer et al., 2003). We reasoned that photorespiration might be required in CCMB1, as

402 photorespiratory genes are essential in cyanobacteria (Eisenhut et al., 2008) and  
403 chemolithoautotrophic bacteria (Desmarais et al., 2019) even though both employ CCMs.

## 404 Recombinant expression of rubisco, *prk*, and CCM components

405 pFE21 and pFA31 are compatible vectors derived from pZE21 and pZA31 (Lutz and Bujard,  
406 1997). These vectors use an anhydrotetracycline (aTc) inducible  $P_{\text{LtetO-1}}$  promoter to regulate gene  
407 expression. pF plasmids were modified from parent vectors to constitutively express the tet  
408 repressor (TetR) under the  $P_{\text{bla}}$  promoter so that expression is repressed by default (Liang et al.,  
409 1999). We found that an inducible system aids in cloning problematic genes like *prk* (Wilson et  
410 al., 2018). We refer to these vectors as pFE and pFA respectively. The p1A plasmid (Figure 2A)  
411 derives from pFE and expresses two additional genes: the Form IA rubisco from *H. neapolitanus*  
412 and a *prk* gene from *Synechococcus elongatus* PCC 7942. The pCB plasmid is properly called  
413 pFE-CB, while pCCM is pFA-CCM. The two CCM plasmids are diagrammed in Figure 3 - figure  
414 supplement 1. Cloning was performed by Gibson and Golden-Gate approaches as appropriate.  
415 Large plasmids (e.g. pCB, pCCM) were verified by Illumina resequencing (Harvard MGH DNA  
416 Core plasmid sequencing service) and maps were updated manually after reviewing results  
417 compiled by breseq resequencing software (Deatherage and Barrick, 2014). Plasmids used in  
418 this study are described in Table S2 and available on Addgene at  
419 [https://www.addgene.org/David\\_Savage/](https://www.addgene.org/David_Savage/).

## 420 Verifying the dependence of CCMB1 on rubisco carboxylation

421 To verify the dependence of CCMB1 on rubisco and Prk activities in minimal media, we  
422 constructed the variants of p1A carrying inactive rubisco or *prk* genes. Rubisco was inactivated  
423 by mutating the large subunit active site lysine to methionine, producing p1A CbbL K194M, or  
424 p1A CbbL<sup>-</sup> for short (Andersson et al., 1989; Cleland et al., 1998). Prk was inactivated by mutating  
425 ATP-binding residues in the Walker A motif, producing p1A Prk K20M S21A, termed p1A Prk<sup>-</sup>  
426 for short (Cai et al., 2014; Higgins et al., 1986). CCMB1:p1A grew on glycerol and gluconate minimal  
427 media when provided 10% CO<sub>2</sub> (Figure 2 - figure supplement 3). CCMB1:p1A CbbL<sup>-</sup> and  
428 CCMB1:p1A Prk<sup>-</sup> both failed to grow on minimal media supplemented with glycerol or gluconate,  
429 demonstrating a dependence on both enzymes. So long as high CO<sub>2</sub> was provided, neither  
430 activity was required for growth in rich LB media, which contains abundant nucleic acids  
431 precursors (Sezonov et al., 2007). Xylose minimal media was also tested but growth was  
432 impractically slow (data not shown).

433  
434 The high-CO<sub>2</sub> requirement of CCMB1:p1A growth was expected for two reasons: (i) bacterial  
435 rubiscos typically display low net carboxylation rates in ambient air due to relatively low CO<sub>2</sub>  
436 ( $\approx 0.04\%$ ) and relatively high O<sub>2</sub> ( $\approx 21\%$ ), as shown in Figure 1B and discussed in (Flamholz et al.,  
437 2019; Iñiguez et al., 2020), and (ii) CCMB1 entirely lacks carbonic anhydrase activity ( $\Delta\text{cynT}$   
438  $\Delta\text{can}$ ). Carbonic anhydrase knockouts of many microbes, including *E. coli* and *S. cerevisiae*, are  
439 high-CO<sub>2</sub> requiring, likely due to cellular demand for HCO<sub>3</sub><sup>-</sup> (Aguilera et al., 2005; Desmarais et  
440 al., 2019; Du et al., 2014; Merlin and Masters, 2003).

441  
442 To verify that CCMB1 growth depends specifically on rubisco carboxylation and not oxygenation,  
443 we grew CCMB1:p1A on glycerol minimal medium in anoxic high-CO<sub>2</sub> conditions (10:90 CO<sub>2</sub>:N<sub>2</sub>,  
444 Figure 2 - figure supplement 4). *E. coli* predominantly respire glycerol and, therefore, grows  
445 extremely slowly on glycerol in anaerobic and low O<sub>2</sub> conditions (Stolper et al., 2010). We  
446 therefore supplied 20 mM NO<sub>3</sub><sup>-</sup> as an alternate terminal electron acceptor (Uden and Dünwald,  
447 2008) in anaerobic growth conditions (see “Growth conditions”). CCMB1:p1A grew on glycerol  
448 media in anaerobic conditions when NO<sub>3</sub><sup>-</sup> was provided. Growth is qualitatively weaker than a  
449 wild-type control, but this is consistent with the growth differences observed in aerobic conditions  
450 (Figure 2 - figure supplement 4). Anaerobic growth of CCMB1:p1A on glycerol minimal media  
451 implies that growth can be supported by rubisco carboxylation alone and does not require the  
452 rubisco-catalyzed oxygenation of RuBP.

## 453 Strain verification by PCR and phenotypic testing

454 As CCMB1 is a relatively slow-growing knockout strain, we occasionally observed contaminants  
455 in growth experiments. We used two strategies to detect contamination by faster-growing  
456 organisms (e.g. wild-type *E. coli*). As most strains grew poorly or not at all in ambient air, pre-  
457 cultures grown in 10% CO<sub>2</sub> were accompanied by a matching 1 mL negative control in ambient  
458 air. Pre-cultures showing growth in the negative control were discarded or verified by PCR  
459 genotyping in cases where air-growth was plausible.

460  
461 PCR genotyping was performed using primer sets documented in Table S3. Three primer pairs  
462 were used to probe a control locus (*zwf*) and two target loci (*cynT* and *rpiA*). The *zwf* locus is  
463 intact in all strains. *cynT* and *rpiA* probes test for the presence of the CCMB1 strain (genotype  
464 BW25113  $\Delta rpiAB \Delta edd \Delta cynT \Delta can$ ). Notably, the CAfree strain (BW25113  $\Delta cynT \Delta can$ ) that we  
465 previously used to test the activity of DAB-type transporters (Desmarais et al., 2019) is a *cynT*  
466 knockout but has a wild-type *rpiA* locus, so this primer set can distinguish between wild-type,  
467 CAfree and CCMB1. This was useful for some experiments where CAfree was used as a control  
468 (e.g. Figures S7-8). Pooled colony PCRs were performed using Q5 polymerase (NEB), annealing  
469 at 65 °C and with a 50 second extension time.

## 470 Selection for growth in novel conditions

471 CCMB1:pCB did not initially grow in glycerol minimal media, which was unexpected because pCB  
472 carries rubisco and *prk* genes. We therefore performed a series of selection experiments (Herz  
473 et al., 2017) to isolate plasmids conferring growth at elevated CO<sub>2</sub> and then in ambient air. We  
474 first describe the methodology; the full series of experiments is diagrammed fully in Figure S5B  
475 and described in paragraphs below. CCMB1 cultures carrying appropriate plasmids were first  
476 grown to saturation in rich LB media in a 10% CO<sub>2</sub> incubator. Stationary phase cultures were  
477 pelleted by centrifugation for 10 min at 4,000 x g, washed in 2x the culture volume, and  
478 resuspended in 1x culture volume of M9 media with no carbon source. After resuspension,  
479 multiple dilutions were plated on selective media (e.g. M9 glycerol media) and incubated in the  
480 desired conditions (e.g. in ambient air) with a positive control in 10% CO<sub>2</sub> on appropriate media.



481 In later experiments, matching tenfold titers were plated in permissive conditions (e.g. in 10%  
482 CO<sub>2</sub>) to estimate the number of viable cells. When colonies formed in restrictive conditions, they  
483 were picked into permissive media, grown to saturation, washed and tested for re-growth in  
484 restrictive conditions by titer plating or streaking. Plasmid DNA was isolated from verified colonies  
485 and transformed into naive CCMB1 cells to test whether plasmid mutations confer improved  
486 growth (i.e. in the absence of genomic mutations).

487  
488 We first selected for CCMB1:pCB growth on M9 glycerol media in 10% CO<sub>2</sub> and then in M9  
489 gluconate media under 10% CO<sub>2</sub>. Pre-cultures to stationary phase in rich media in 10% CO<sub>2</sub>, and  
490 then plated on selective media after washing. The resulting plasmid, pCB-gg for “gluconate  
491 grower,” was isolated and deep sequenced (Harvard MGH DNA Core plasmid sequencing  
492 service). Plasmid maps were updated manually after running the breseq resequencing software  
493 (Deatherage and Barrick, 2014). pCB-gg was found to carry two regulatory mutations: an amino  
494 acid substitution to the tet repressor (TetR E37A) and a nucleotide substitution in the Tet operator  
495 regulating the carboxysome operon (tetO<sub>2</sub> +8T, Table S4).

496  
497 Following this first round of selection, CCMB1 was co-transformed with pCB-gg and pCCM. The  
498 transformants grew in M9 glycerol media in 10% CO<sub>2</sub> but failed to grow on in ambient air. We  
499 therefore performed another selection experiment, plating CCMB1:pCB-gg+pCCM on M9 glycerol  
500 media in ambient CO<sub>2</sub>. Parallel negative control selections were conducted on uninduced plates  
501 (no aTc) and using CCMB1:p1A+pCCM, which lacks carboxysome genes. Colonies formed on  
502 induced CCMB1:pCB-gg+pCCM plates after 20 days, but not on control plates (Figure S5F).

503  
504 Forty colonies were picked and tested for re-growth in ambient CO<sub>2</sub> by tenfold titer plating. 10 of  
505 40 regrew (six examples are shown in Figure S5G). Pooled plasmid DNA was extracted from  
506 verified colonies and electroporated into naive CCMB1 to test plasmid-linkage of growth. We  
507 found that plasmid DNA from colony #4 produced the most robust growth in ambient air. This was  
508 tested by picking 16 re-transformants and testing their growth in ambient air in liquid M9 glycerol  
509 media. Re-transformant #13 regrew robustly in all 6 technical replicates. Pooled plasmid DNA  
510 from colony #4 re-transformant #13 was resequenced by a combination deep sequencing (as  
511 above) and targeted Sanger sequencing of the TetR locus and origins of replication, as these  
512 regions share sequence between both parent plasmids. pCB carried the same mutations as pCB-  
513 gg and pCCM had acquired the high-copy ColE1 origin of replication from pCB (Table S4). The  
514 individual mutant plasmids, termed pCB' and pCCM', were reconstructed from pooled plasmid  
515 extract by PCR and Gibson cloning.

516  
517 These post-selection plasmids, termed pCB' and pCCM', were again verified by resequencing.  
518 Naive CCMB1 was transformed with the reconstructed post-selection plasmids pCB' and pCCM'  
519 and tested for growth in ambient air. We found that the post-selection plasmids confer  
520 reproducible growth in ambient air in multiple growth conditions (Figure 3), implying that genomic  
521 mutations that formed during selections were not required to produce growth in ambient air.

## 522 Design of mutant CCM plasmids

523 To verify that air-growth depends on the known components of the CCM, we generated variants  
524 of pCB' and pCCM' carrying known, targeted null mutations to the CCM. CCMB1 was co-  
525 transformed with two plasmids: a mutant plasmid (of either pCB' or pCCM') and its cognate,  
526 unmodified plasmid. Mutant plasmids are listed here along with expected growth phenotypes, with  
527 fuller detail in Table S2. pCB' CbbL K194M, or pCB', contains an inactivating mutation to the  
528 large subunit of the carboxysomal Form 1A rubisco (Andersson et al., 1989; Cleland et al., 1998).  
529 This mutation was expected to abrogate rubisco-dependent growth entirely.

530  
531 Mutations targeting the CCM, rather than rubisco itself, are expected to ablate growth in ambient  
532 air but permit growth in high CO<sub>2</sub>. The following plasmid mutations were designed to specifically  
533 target essential components of the CCM. pCB' CsoSCA C173S, or pCB' CsoSCA, carries a  
534 mutation to an active site cysteine residue responsible for coordinating the catalytic Zn<sup>2+</sup> ion in  
535 β-carbonic anhydrases (Sawaya et al., 2006). pCB' CsoS2 ΔNTD lacks the N-terminal domain of  
536 CsoS2, which is responsible for recruiting rubisco to the carboxysome during the biogenesis of  
537 the organelle (Oltrogge et al., 2020). Similarly, pCB' CbbL Y72R carries an arginine residue  
538 instead of the tyrosine responsible for mediating cation-π interactions between the rubisco large  
539 subunit and the N-terminus of CsoS2. This mutation was shown to eliminate any binding interaction  
540 between the rubisco complex and the N-terminus of CsoS2 (Oltrogge et al., 2020). pCB' ΔcsoS4AB  
541 lacks both pentameric shell proteins, CsoS4AB, which was shown to disrupt the permeability  
542 barrier at the carboxysome shell (Cai et al., 2009). pCCM' DabA1 C462A, D464A, or pCCM'  
543 DabA1, carries inactivating mutations to the putative active site of the inorganic carbon  
544 transporter component DabA1 (Desmarais et al., 2019).

545  
546 Two more mutant plasmids were designed to test the roles of rubisco chaperones in producing a  
547 functional CCM. pCCM' CbbQ K46A, E107Q, denoted pCCM' CbbQ, carries mutations that  
548 inactivate the ATPase activity of the CbbQ subunit of the CbbOQ rubisco activase complex (Tsai  
549 et al., 2015). pCCM' ΔacRAF lacks the putative rubisco chaperone acRAF. acRAF is homologous  
550 to a plant rubisco folding chaperone (Aigner et al., 2017) and likely involved in the folding of the  
551 *H. neapolitanus* Form IA rubisco (Wheatley et al., 2014). Experimental evaluation of growth  
552 phenotypes for the above-described mutants is detailed below and results are given in Figure 4 -  
553 figure supplement 1.

## 554 Phenotyping of matched cultures in 10% CO<sub>2</sub> and ambient air

555 To interrogate the phenotypic effects of mutations to the CCM, we tested the growth of matched  
556 biological replicate cultures of CCM mutants (e.g. disruption of carboxysome components or  
557 transporter function) in M9 glycerol medium in 10% CO<sub>2</sub> and ambient air (Figure 4A). For these  
558 experiments, individual colonies were picked into a round-bottom tube with 4 mL of M9 glycerol  
559 media with full strength antibiotic and 100 nM aTc. 1 mL of culture was then transferred to a  
560 second tube. The 3 mL pre-culture was incubated in 10% CO<sub>2</sub>, while the 1 mL culture was  
561 incubated in ambient air as a negative control. Control strains unable to grow in minimal media  
562 (e.g. those expressing inactive rubisco mutants) were pre-cultured in LB media. High-CO<sub>2</sub> pre-

563 cultures were grown to saturation, after which optical density (OD600) was measured in five-fold  
564 dilution.

565  
566 Experimental cultures were inoculated with pre-culture to a starting OD600 of 0.01 in 3 mL of M9  
567 glycerol media with 12.5 mg/L chloramphenicol and 100 nM aTc. Each pre-culture was used to  
568 inoculate a matched pair of experimental cultures, one incubated in 10% CO<sub>2</sub> and another in  
569 ambient air, as diagrammed in Figure 4A. After a defined period of growth (4 days in Figure 4B  
570 and 12 days in Figure 4 - figure supplement 1, panel C) all culture densities were measured at  
571 600 nm. All experiments were performed in biological quadruplicate, i.e. using four independent  
572 pre-cultures deriving from distinct colonies to inoculate four pairs of matched cultures. A positive  
573 control was included in all experiments to test the media composition. We used a complemented  
574 double carbonic anhydrase knockout (CAfree:pFE-sfGFP+pFA-HCAII) for this purpose as its  
575 growth in air depends on the expression of the human carbonic anhydrase II from the pFA-HCAII  
576 plasmid (Desmarais et al., 2019).

## 577 Electron microscopy

578 CCMB1:pCB'+pCCM' was grown in ambient air in 3 ml of M9 glycerol medium and induced with  
579 100 nM aTc. A carboxysome-negative control, CAfree:pFE-sfGFP+pFA-HCAII, was grown in the  
580 same conditions. Sample preparation and sectioning were performed by the University of  
581 California Berkeley Electron Microscope Laboratory. Cell pellets were fixed for 30 min at room  
582 temperature in 2.5% glutaraldehyde in 0.1 M cacodylate buffer pH 7.4. Fixed cells were stabilized  
583 in 1% very low melting-point agarose and cut into small cubes. Cubed sample was then rinsed  
584 three times at room temperature for 10 min in 0.1 M sodium cacodylate buffer, pH 7.4 and then  
585 immersed in 1% osmium tetroxide with 1.6% potassium ferricyanide in 0.1 M cacodylate buffer  
586 for an hour in the dark on a rocker. Samples were later rinsed three times with a cacodylate buffer  
587 and then subjected to an ascending series of acetone for 10 min each (35%, 50%, 75%, 80%,  
588 90%, 100%, 100%). Samples were progressively infiltrated with Epon resin (EMS, Hatfield, PA,  
589 USA) while rocking and later polymerized at 60 °C for 24 hours. 70 nm thin sections were cut  
590 using an Ultracut E (Leica) and collected on 100 mesh formvar coated copper grids. The grids  
591 were further stained for 5 min with 2% aqueous uranyl acetate and 4 min with Reynold's lead  
592 citrate. The sections were imaged using a Tecnai 12 TEM at 120 KV (FEI) and images were  
593 collected using UltraScan 1000 digital micrograph software (Gatan Inc.).

## 594 Sample preparation for LC-MS analysis

595 Protein-bound amino acids were analyzed in total biomass hydrolysate of 80 mL cultures grown  
596 in minimal media with 99% <sup>13</sup>C glycerol (Cambridge Isotopes) as the sole organic carbon source.  
597 These cultures were grown in 80 mL volumes in a bioreactor pumping ambient air (MC1000, PSI).  
598 After harvesting biomass, samples were prepared and analyzed as described in (Antonovsky et  
599 al., 2016). Briefly, the OD600 was recorded and 0.6 OD x mL of sample were pelleted by  
600 centrifugation for 15 min at 4,000 x g. The pellet was resuspended in 1 mL of 6 N HCl and  
601 incubated for 24 hours at 110 °C. The acid was subsequently evaporated under a nitrogen stream  
602 using a custom-built gas manifold (Nevins et al., 2005), resulting in a dry hydrolysate. Dry

603 hydrolysates were resuspended in 0.6 mL of MilliQ water, centrifuged for 5 min at 14,000 x g, and  
604 supernatant was analyzed by liquid chromatography-mass spectrometry (LC-MS). Hydrolyzed  
605 amino acids were separated using ultra performance liquid chromatography (UPLC, Acquity,  
606 Waters) on a C-8 column (Zorbax Eclipse XBD, Agilent) at a flow rate of 0.6 mL/min, and eluted  
607 off the column using a hydrophobicity gradient. Buffers used were: A) H<sub>2</sub>O + 0.1% formic acid  
608 and B) acetonitrile + 0.1% formic acid with the following gradient: 100% of A (0-3 min), 100% A  
609 to 100% B (3-9 min), 100% B (9-13 min), 100% B to 100% A (13-14 min), 100% A (14-20 min).  
610 The UPLC was coupled online to a triple quadrupole mass spectrometer (TQS, Waters). Data  
611 were acquired using MassLynx v4.1 (Waters). Amino acids and metabolites used for analysis  
612 were selected according to the following criteria: amino acids that had peaks at a distinct retention  
613 time and m/z values for all isotopologues and also showed correct <sup>13</sup>C labeling fractions in control  
614 samples that contained protein hydrolyzates of WT cells grown with known ratios of <sup>13</sup>C6-glucose  
615 to <sup>12</sup>C-glucose.

## 616 Isotopic analysis composition of biomolecules

617 The total <sup>13</sup>C fraction of each metabolite was determined as the weighted average of the fractions  
618 of all the isotopologues for that metabolite:

619

$$620 \quad f_{13c} = \frac{\sum_{i=0}^N f_i \times i}{N}$$

621

622 Here N is the number of carbons in the compound (e.g. N = 3 for serine) and  $f_i$  is the relative  
623 fraction of the i-th isotopologue, i.e containing  $i$  <sup>13</sup>C carbon atoms. Each metabolite's total <sup>12</sup>C  
624 fraction was calculated as  $f_{12c} = 1 - f_{13c}$ .

## 625 Estimating the effective intracellular <sup>12</sup>CO<sub>2</sub> fraction

626 *E. coli* cells grown in <sup>13</sup>C glycerol will simultaneously respire glycerol, producing intracellular  
627 <sup>13</sup>CO<sub>2</sub>, and take up extracellular <sup>12</sup>CO<sub>2</sub> and H<sup>12</sup>CO<sub>3</sub><sup>-</sup>. The isotopic composition of the intracellular  
628 inorganic carbon (C<sub>i</sub>) pool will therefore reflect the balance of uptake and respiration. As rubisco  
629 carboxylation draws from the intracellular CO<sub>2</sub> pool, we must estimate the isotopic composition of  
630 the C<sub>i</sub> pool to evaluate the contribution of rubisco to metabolism. We used the carbamoyl-  
631 phosphate moiety as a marker for the isotopic distribution of the intracellular C<sub>i</sub> pool, as described  
632 in (Gleizer et al., 2019). Briefly, carbamoyl-phosphate is generated by phosphorylation of  
633 bicarbonate, and is condensed with ornithine in the biosynthesis of L-arginine. We compared the  
634 mass isotopologue distribution of L-arginine, which contains one carbon from carbamoyl-  
635 phosphate, with the mass isotopologue distribution of L-glutamate as L-glutamate is an ornithine  
636 precursor.

637

638 We estimated the effective <sup>13</sup>C labeling of intracellular inorganic carbon ( $f_{13CO_2, effective}$ ) as follows:

$$639 \quad f_{13CO_2, effective} = \sum_{i=0}^6 f_{arg,i} - \sum_{i=0}^5 f_{glu,i}$$

640

641 Here  $f_{^{13}\text{CO}_2, \text{effective}}$  is the relative fraction of  $^{13}\text{CO}_2$  out of the total  $\text{CO}_2$  pool (or, more formally,  
 642 the  $C_i$ ), and  $f_{\text{arg}, i}$  and  $f_{\text{glu}, i}$  are the fraction of the  $i$ -th isotopologue of arginine and glutamate  
 643 respectively. We assumed fast equilibration of the intracellular  $C_i$  pool because the strains used  
 644 in labeling experiments express a carbonic anhydrase. An equivalent equation can be defined for  
 645 the arginine-proline comparison (Gleizer et al., 2019), however proline data were of insufficient  
 646 quality to use and so we report inferences based on the arginine-glutamate comparison. The  
 647 effective intracellular fraction of  $^{12}\text{CO}_2$  was calculated as  $f_{^{12}\text{CO}_2, \text{effective}} = 1 - f_{^{13}\text{CO}_2, \text{effective}}$ .  
 648 For brevity, we refer to these fractions as  $f_{^{12}\text{CO}_2}$  and  $f_{^{13}\text{CO}_2}$ , respectively.

## 649 Estimating the rubisco carboxylation flux *in vivo*

650 When CCMB1 cells are grown on 99%  $^{13}\text{C}$  glycerol, 3-phosphoglycerate (3PG) can be produced  
 651 via two routes: (i) rubisco catalyzed carboxylation of RuBP and (ii) glycolytic metabolism of  
 652 glycerol via dihydroxyacetone phosphate, or DHAP (Booth, 2005). We denote these two fluxes  
 653 as  $J_{\text{rubisco}}$  and  $J_{\text{pgk}}$ , where pgk (phosphoglycerate kinase) is the glycolytic enzyme producing 3PG  
 654 (Bar-Even et al., 2012). Serine is a direct metabolic product of 3PG (Stauffer, 2004; Szyperski,  
 655 1995) and was therefore assumed to have the same  $^{12}\text{C}$  composition as 3PG. Rubisco-catalyzed  
 656 carboxylation of RuBP adds one  $\text{CO}_2$  to the 5-carbon substrate, producing two 3PG molecules  
 657 containing a total of six carbon atoms. Therefore,  $\frac{1}{6}$  of carbon atoms on 3PG produced via rubisco  
 658 carboxylation must derive from an inorganic source (Figure 5 - figure supplement 3).  
 659 Carboxylation draws  $\text{CO}_2$  from the intracellular inorganic carbon pool, whose  $^{12}\text{C}$  composition  
 660  $f_{^{12}\text{CO}_2}$  was inferred as described above.

661

662 Based on these assumptions, the  $^{12}\text{C}$  composition of 3PG, and therefore serine, equals a flux-  
 663 weighted sum of contributions from rubisco and pgk. As such, the relative 3PG production flux  
 664 that is due to rubisco,  $J_{\text{rubisco}}/(J_{\text{rubisco}}+J_{\text{pgk}})$ , can be inferred via the following calculation:

665

$$666 \quad f_{\text{ser}, \text{ctrl}} = f_{3\text{PG}, \text{ctrl}} = 0 \times \frac{1}{6}(f_{^{12}\text{CO}_2} + 5 \times f_{\text{RuBP}, \text{exp}}) + 1 \times f_{\text{DHAP}, \text{ctrl}} = f_{\text{DHAP}, \text{ctrl}}$$

$$667 \quad f_{\text{ser}, \text{exp}} = f_{3\text{PG}, \text{ctrl}} = \frac{J_{\text{rubisco}}}{J_{\text{rubisco}} + J_{\text{pgk}}} \times \frac{1}{6}(f_{^{12}\text{CO}_2} + 5 \times f_{\text{RuBP}, \text{exp}}) + \frac{J_{\text{pgk}}}{J_{\text{rubisco}} + J_{\text{pgk}}} \times f_{\text{DHAP}, \text{exp}}$$

668

669 Where the first equation is written for the control and the second for experimental cultures where  
 670 rubisco is active (CCMB1:pCB'+pCCM').  $f_{\text{ser}, \text{ctrl}}$  and  $f_{\text{ser}, \text{exp}}$  denote the  $^{12}\text{C}$  composition of serine  
 671 in the control and experiment respectively. Identical notation is used for RuBP and DHAP. As  
 672 there are only two routes of 3PG production, the above equations can be simplified to solve for  
 673 the relative flux through rubisco *in vivo*:

674

$$675 \quad \frac{J_{\text{pgk}}}{J_{\text{rubisco}} + J_{\text{pgk}}} \equiv 1 - \frac{J_{\text{rubisco}}}{J_{\text{rubisco}} + J_{\text{pgk}}}$$



676

$$\frac{J_{rubisco}}{J_{rubisco} + J_{pgk}} = \frac{f_{ser,exp} - f_{DHAP,exp}}{\frac{1}{6}(f_{12CO_2} + 5 \times f_{RUBP,exp}) - f_{DHAP,exp}}$$

677

678 To calculate the rubisco flux *in vivo* we must attach values to several parameters in the above  
679 equation.  $f_{12CO_2}$  was inferred on a per-sample basis, with the mean values being  $25\% \pm 4\%$  and  
680  $67\% \pm 28\%$  for the control and experiment respectively (Figure 5 - figure supplement 3, panel C).  
681 Because glycerol is converted into 3PG and serine via DHAP in wild-type *E. coli* (Booth, 2005),  
682 we expect that  $f_{ser,ctrl} = f_{DHAP,ctrl}$ , as derived above. LC-MS measurements give  $f_{ser,ctrl} =$   
683  $0.6\% \pm 0.2\%$  and  $f_{ser,exp} = 3.5\% \pm 2.2\%$  (Figure 5C). Valine is also a metabolic product of DHAP  
684 (Szyperski, 1995) and was found to have a similar  $^{12}C$  fraction  $f_{val,ctrl} = 0.6\% \pm 0.1\%$  in control  
685 cells (Figure 5 - figure supplement 2). Since glycerol is immediately converted to DHAP in *E. coli*,  
686 we further assumed that  $f_{DHAP,ctrl} = f_{DHAP,exp}$ .

687

688 RuBP is produced in CCMB1 when rubisco and prk are expressed. Since glycerol is the sole  
689 carbon source and there are no carboxylation reactions between DHAP and RuBP in CCMB1, we  
690 assumed  $f_{RuBP,exp} = f_{DHAP,ctrl}$ . This assumption is supported by LC-MS measurements of  
691 histidine in control cells. Like RuBP, histidine is synthesized from a pentose-phosphate pathway  
692 intermediates (Szyperski, 1995; Winkler and Ramos-Montañez, 2009), and measured  $f_{his,ctrl} =$   
693  $0.7\% \pm 0.1\%$ , which is very similar to  $f_{ser,ctrl} = 0.6\% \pm 0.3\%$ . Using mean values to illustrate the  
694 calculation gives  $\frac{J_{rubisco}}{J_{rubisco} + J_{pgk}} = \frac{3.5\% - 0.6\%}{\frac{1}{6}(67\% + 5 \times 0.6\%) - 0.6\%} = 0.26$ , implying that 26% of 3PG production is

695 due to rubisco.

696

697  $10^5$  random samples were drawn from the experimentally determined parameter ranges to  
698 estimate a 99% confidence interval on the rubisco flux fraction. As the  $^{12}C$  composition of  
699 inorganic carbon ( $f_{12CO_2}$ ) and serine are mechanistically linked via rubisco, these values were  
700 assumed to co-vary. Distributions were estimated on a per-sample basis by assuming 0.1% error  
701 in direct measurement of serine and 1% error in the inference of  $f_{12CO_2}$ . These calculations gave  
702 a median flux estimate of 19% with 99% of values falling between 4.0% and 47.3%. The sample  
703 with the lowest inferred rubisco flux had a median estimate of 10.2% with 99% of values falling  
704 between 2.5% and 17.9%, implying that rubisco is responsible for a nonzero fraction of 3PG  
705 production in all samples. Applying a wider error range of 5% to  $f_{12CO_2}$  did not qualitatively change  
706 results, giving an overall median flux fraction of 19.1% and a 99% confidence interval 3.9-50.7%.  
707 This and above calculations can be found in the following Jupyter notebook:  
708 [https://github.com/flamholz/carboxecoli/blob/master/notebooks/00\\_LCMS\\_calcs.ipynb](https://github.com/flamholz/carboxecoli/blob/master/notebooks/00_LCMS_calcs.ipynb).

## 709 Predicting rubisco carboxylation flux via Flux Balance Analysis

710 A stoichiometric model of complemented CCMB1 was generated from the Core *Escherichia coli*  
711 Metabolic Model (Orth et al., 2010) by adding rubisco and prk and then deleting the rpi and edd  
712 reactions. Parsimonious Flux Balance Analysis (pFBA) was applied to the resulting model to  
713 calculate intracellular metabolic fluxes that maximize the rate of biomass production.

714 As many distinct flux distributions can yield the same (maximal) rate of biomass production, pFBA  
715 uses the minimum sum of fluxes objective to define a unique flux solution (Holzhütter, 2004). The  
716 COBRApy implementation of pFBA introduces an additional free parameter, the permissible  
717 fraction of the maximal biomass production rate  $f_{opt}$  (Ebrahim et al., 2013). When  $f_{opt} < 1.0$ , the  
718 biomass production can be less-than-optimal if this would further decrease the sum of fluxes.

719

720 pFBA was run with  $f_{opt}$  ranging from 0.8 to 1.0 in increments of 0.01 to account for the fact that  
721 CCMB1 has not undergone selection to maximize biomass production with rubisco expressed.  
722 For each resulting flux distribution the fraction of 3PG production flux due to rubisco was  
723 calculated as the fraction of 3PG molecules produced via rubisco carboxylation divided by the  
724 total flux to 3PG. These calculations predict that 19.5%-21.5% of 3PG production is due to  
725 rubisco. The model was rerun after removing all possibility for product secretion by deleting all  
726 carbon-containing exchange reactions other than glycerol and CO<sub>2</sub> exchange. This modification  
727 should give an upper bound on the fraction of 3PG production due to rubisco, as carbon cannot  
728 be shunted away from biomass production to overflow products. The “no overflow” model  
729 predicted that 23.9% of 3PG production is due to rubisco independent of  $f_{opt}$ . The range of  
730 predictions from 19.5-23.9% is plotted in Figure 5D. All calculations were done using Python and  
731 COBRApy (Ebrahim et al., 2013), and can be found in this Jupyter notebook:  
732 [https://github.com/flamholz/carboxecoli/blob/master/notebooks/01\\_FBA\\_rubisco\\_flux\\_prediction](https://github.com/flamholz/carboxecoli/blob/master/notebooks/01_FBA_rubisco_flux_prediction.ipynb)  
733 [.ipynb](https://github.com/flamholz/carboxecoli/blob/master/notebooks/01_FBA_rubisco_flux_prediction.ipynb).

734

735

736 **Acknowledgements:** We thank Matt Davis for P1 transduction materials and advice, Hernan  
737 Garcia and Han Lim for pZ plasmids, Maggie Stoeva, Anna Engelbrekton, Anchal Mehra, Sophia  
738 Ewens and Tyler Barnum for help with anaerobic growth, Reena Zalpuri and Danielle Jorgens at  
739 the University of California Berkeley Electron Microscope Laboratory for advice and assistance  
740 with electron microscopy, and Rob Egbert and Adam Arkin for KEIO strains. We are grateful to  
741 Eric Estrin, Woody Fischer, Darcy McRose, Dipti Nayak, Sabeeha Merchant, Luke Oltrogge, and  
742 Naiya Phillips for detailed comments on the manuscript, and to Dan Arlow, Yinon Bar-On, Dan  
743 Davidi, Jack Desmarais, Hernan Garcia, Oliver Mueller-Cajar, Rob Nichols, Kris Niyogi, Dan  
744 Portnoy, Morgan Price, Noam Prywes, Jeremy Roop, Rachel Shipps, Patrick Shih, and Dan  
745 Tawfik, for support, advice and helpful discussions throughout.

746  
747 **Funding:** This work was supported by a National Science Foundation Graduate Research  
748 Fellowship (to A.I.F.), grants from the US Department of Energy (no. DE-SC00016240) and Royal  
749 Dutch Shell (Energy Biosciences Institute project CW163755) to D.F.S., and from the European  
750 Research Council (Project NOVCARBFIX 646827) to R.M. R.M. is the Charles and Louise  
751 Gartner Professional Chair.

752  
753 **Author contributions:** A.I.F. conceived of and designed all experiments with mentorship from  
754 R.M. and D.F.S. and support from all authors. S.A., N.A., E.N., A.B-E. and R.M. designed and  
755 constructed the  $\Delta rpiAB$  strain from which A.I.F., E.J.D, and S.R. constructed CCMB1. A.I.F.,  
756 E.J.D, and S.R. designed and constructed all other strains and plasmids. A.I.F and E.J.D.  
757 performed growth and selection experiments. C.B. performed electron microscopy. S.G. and R.B-  
758 N. performed LC-MS analysis on biomass hydrolysate prepared by A.I.F. and E.J.D. A.I.F., S.G.,  
759 R.B-N., and E.N. analysed isotopic labeling data. A.I.F and E.N. designed and executed Flux  
760 Balance Analysis. A.I.F. wrote the manuscript with input from all authors.

761  
762 **Competing interests:** D.F.S. is a co-founder of Scribe Therapeutics and a scientific advisory  
763 board member of Scribe Therapeutics and Mammoth Biosciences. A.B.-E. is co-founder of b.fab.  
764 These companies were not involved in this research in any way. All other authors declare no  
765 competing interests.

766  
767 **Data and materials availability:** All data associated with this work is available in the main text,  
768 supplementary materials and the repository at <https://github.com/flamholz/carboxecoli>. Plasmids  
769 available on Addgene at [https://www.addgene.org/David\\_Savage/](https://www.addgene.org/David_Savage/), strains distributed on request.

770  
771  
772  
773  
774  
775  
776

## 777 References

- 778 Aguilera J, Van Dijken JP, De Winde JH, Pronk JT. 2005. Carbonic anhydrase (Nce103p): an  
779 essential biosynthetic enzyme for growth of *Saccharomyces cerevisiae* at atmospheric  
780 carbon dioxide pressure. *Biochem J* **391**:311–316.
- 781 Aigner H, Wilson RH, Bracher A, Calisse L, Bhat JY, Hartl FU, Hayer-Hartl M. 2017. Plant  
782 RuBisCo assembly in *E. coli* with five chloroplast chaperones including BSD2. *Science*  
783 **358**:1272–1278.
- 784 Andersson I, Knight S, Schneider G, Lindqvist Y, Lundqvist T, Brändén C-I, Lorimer GH. 1989.  
785 Crystal structure of the active site of ribulose-bisphosphate carboxylase. *Nature* **337**:229–  
786 234.
- 787 Antonovsky N, Gleizer S, Noor E, Zohar Y, Herz E, Barenholz U, Zelcbuch L, Amram S, Wides  
788 A, Tepper N, Davidi D, Bar-On Y, Bareia T, Wernick DG, Shani I, Malitsky S, Jona G, Bar-  
789 Even A, Milo R. 2016. Sugar Synthesis from CO<sub>2</sub> in *Escherichia coli*. *Cell* **166**:115–125.
- 790 Baba T, Ara T, Hasegawa M, Takai Y, Okumura Y, Baba M, Datsenko K a., Tomita M, Wanner  
791 BL, Mori H. 2006. Construction of *Escherichia coli* K-12 in-frame, single-gene knockout  
792 mutants: the Keio collection. *Mol Syst Biol* **2**:2006.0008.
- 793 Bar-Even A, Flamholz A, Noor E, Milo R. 2012. Rethinking glycolysis: on the biochemical logic  
794 of metabolic pathways. *Nat Chem Biol* **8**:509–517.
- 795 Bar-On YM, Milo R. 2019. The global mass and average rate of rubisco. *Proc Natl Acad Sci U S*  
796 *A* **116**:4738–4743.
- 797 Bonacci W, Teng PK, Afonso B, Niederholtmeyer H, Grob P, Silver P a., Savage DF. 2012.  
798 Modularity of a carbon-fixing protein organelle. *Proc Natl Acad Sci U S A* **109**:478–483.
- 799 Booth IR. 2005. Glycerol and Methylglyoxal Metabolism. *EcoSal Plus* **1**:1–8.
- 800 Bowes G, Ogren WL. 1972. Oxygen inhibition and other properties of soybean ribulose 1,5-  
801 diphosphate carboxylase. *J Biol Chem* **247**:2171–2176.
- 802 Bremer H, Dennis PP. 2008. Modulation of Chemical Composition and Other Parameters of the  
803 Cell at Different Exponential Growth Rates. *EcoSal Plus* **3**:1–49.
- 804 Cai F, Menon BB, Cannon GC, Curry KJ, Shively JM, Heinhorst S. 2009. The pentameric vertex  
805 proteins are necessary for the icosahedral carboxysome shell to function as a CO<sub>2</sub> leakage  
806 barrier. *PLoS One* **4**:e7521.
- 807 Cai Z, Liu G, Zhang J, Li Y. 2014. Development of an activity-directed selection system enabled  
808 significant improvement of the carboxylation efficiency of Rubisco. *Protein Cell* **12**–18.
- 809 Claassens NJ, Sousa DZ, Dos Santos VAPM, de Vos WM, van der Oost J. 2016. Harnessing  
810 the power of microbial autotrophy. *Nat Rev Microbiol* **14**:692–706.
- 811 Cleland WW, Andrews TJ, Gutteridge S, Hartman FC, Lorimer GH. 1998. Mechanism of  
812 Rubisco: The Carbamate as General Base. *Chem Rev* **98**:549–562.
- 813 Datsenko KA, Wanner BL. 2000. One-step inactivation of chromosomal genes in *Escherichia*  
814 *coli* K-12 using PCR products. *Proc Natl Acad Sci U S A* **97**:6640–6645.
- 815 Deatherage DE, Barrick JE. 2014. Identification of mutations in laboratory-evolved microbes  
816 from next-generation sequencing data using breseq. *Methods Mol Biol* **1151**:165–188.
- 817 Desmarais JJ, Flamholz AI, Blikstad C, Dugan EJ, Laughlin TG, Oltrogge LM, Chen AW,  
818 Wetmore K, Diamond S, Wang JY, Savage DF. 2019. DABs are inorganic carbon pumps  
819 found throughout prokaryotic phyla. *Nat Microbiol* **4**:2204–2215.
- 820 Du J, Förster B, Rourke L, Howitt SM, Price GD. 2014. Characterisation of Cyanobacterial  
821 Bicarbonate Transporters in *E. coli* Shows that SbtA Homologs Are Functional in This  
822 Heterologous Expression System. *PLoS One* **9**:e115905.
- 823 Ebrahim A, Lerman JA, Palsson BO, Hyduke DR. 2013. COBRApy: COConstraints-Based  
824 Reconstruction and Analysis for Python. *BMC Syst Biol* **7**:74.
- 825 Eisenhut M, Ruth W, Haimovich M, Bauwe H, Kaplan A, Hagemann M. 2008. The

- 826 photorespiratory glycolate metabolism is essential for cyanobacteria and might have been  
827 conveyed endosymbiotically to plants. *Proc Natl Acad Sci U S A* **105**:17199–17204.
- 828 Ermakova M, Danila FR, Furbank RT, von Caemmerer S. 2020. On the road to C4 rice:  
829 advances and perspectives. *Plant J* **101**:940–950.
- 830 Fischer WW, Hemp J, Johnson JE. 2016. Evolution of Oxygenic Photosynthesis. *Annu Rev*  
831 *Earth Planet Sci* **44**:647–683.
- 832 Flamholz AI, Prywes N, Moran U, Davidi D, Bar-On YM, Oltrogge LM, Alves R, Savage D, Milo  
833 R. 2019. Revisiting Trade-offs between Rubisco Kinetic Parameters. *Biochemistry*  
834 **58**:3365–3376.
- 835 Flamholz A, Shih PM. 2020. Cell biology of photosynthesis over geologic time. *Curr Biol*  
836 **30**:R490–R494.
- 837 Gleizer S, Ben-Nissan R, Bar-On YM, Antonovsky N, Noor E, Zohar Y, Jona G, Krieger E,  
838 Shamshoum M, Bar-Even A, Milo R. 2019. Conversion of *Escherichia coli* to Generate All  
839 Biomass Carbon from CO<sub>2</sub>. *Cell* **179**:1255–1263.e12.
- 840 Herz E, Antonovsky N, Bar-On Y, Davidi D, Gleizer S, Prywes N, Noda-Garcia L, Frisch KL,  
841 Zohar Y, Wernick DG, Others. 2017. The genetic basis for the adaptation of *E. coli* to sugar  
842 synthesis from CO<sub>2</sub>. *Nat Commun* **8**:1705.
- 843 Higgins CF, Hiles ID, Salmond GP, Gill DR, Downie JA, Evans IJ, Holland IB, Gray L, Buckel  
844 SD, Bell AW. 1986. A family of related ATP-binding subunits coupled to many distinct  
845 biological processes in bacteria. *Nature* **323**:448–450.
- 846 Holzhütter H-G. 2004. The principle of flux minimization and its application to estimate  
847 stationary fluxes in metabolic networks. *Eur J Biochem* **271**:2905–2922.
- 848 Iñiguez C, Capó-Bauçà S, Niinemets Ü, Stoll H, Aguiló-Nicolau P, Galmés J. 2020. Evolutionary  
849 trends in RuBisCO kinetics and their co-evolution with CO<sub>2</sub> concentrating mechanisms.  
850 *Plant J* **101**:897–918.
- 851 Kerfeld CA, Melnicki MR. 2016. Assembly, function and evolution of cyanobacterial  
852 carboxysomes. *Curr Opin Plant Biol* **31**:66–75.
- 853 Lewis NE, Nagarajan H, Palsson BO. 2012. Constraining the metabolic genotype–phenotype  
854 relationship using a phylogeny of in silico methods. *Nat Rev Microbiol* **10**:291–305.
- 855 Liang S, Bipatnath M, Xu Y, Chen S, Dennis P, Ehrenberg M, Bremer H. 1999. Activities of  
856 constitutive promoters in *Escherichia coli*. *J Mol Biol* **292**:19–37.
- 857 Lin MT, Occhialini A, Andralojc PJ, Parry MAJ, Hanson MR. 2014. A faster Rubisco with  
858 potential to increase photosynthesis in crops. *Nature* **513**:547–550.
- 859 Long BM, Hee WY, Sharwood RE, Rae BD, Kaines S, Lim Y-L, Nguyen ND, Massey B, Bala S,  
860 von Caemmerer S, Badger MR, Price GD. 2018. Carboxysome encapsulation of the CO<sub>2</sub>-  
861 fixing enzyme Rubisco in tobacco chloroplasts. *Nat Commun* **9**:3570.
- 862 Long BM, Rae BD, Rolland V, Förster B, Price GD. 2016. Cyanobacterial CO<sub>2</sub>-concentrating  
863 mechanism components: function and prospects for plant metabolic engineering. *Curr Opin*  
864 *Plant Biol* **31**:1–8.
- 865 Lutz R, Bujard H. 1997. Independent and tight regulation of transcriptional units in *Escherichia*  
866 *coli* via the LacR/O, the TetR/O and AraC/I1-I2 regulatory elements. *Nucleic Acids Res*  
867 **25**:1203–1210.
- 868 Mackinder LCM, Meyer MT, Mettler-Altmann T, Chen VK, Mitchell MC, Caspari O, Freeman  
869 Rosenzweig ES, Pallesen L, Reeves G, Itakura A, Roth R, Sommer F, Geimer S, Mühlhaus  
870 T, Schroda M, Goodenough U, Stitt M, Griffiths H, Jonikas MC. 2016. A repeat protein links  
871 Rubisco to form the eukaryotic carbon-concentrating organelle. *Proc Natl Acad Sci U S A*  
872 **113**:5958–5963.
- 873 Mangan NM, Flamholz A, Hood RD, Milo R, Savage DF. 2016. pH determines the energetic  
874 efficiency of the cyanobacterial CO<sub>2</sub> concentrating mechanism. *Proc Natl Acad Sci U S A*  
875 **113**:E5354–62.
- 876 Marcus Y, Schwarz R, Friedberg D, Kaplan A. 1986. High CO<sub>2</sub> Requiring Mutant of *Anacystis*



- 877       nidulans R2. *Plant Physiol* **82**:610–612.
- 878   McGrath JM, Long SP. 2014. Can the cyanobacterial carbon-concentrating mechanism increase  
879       photosynthesis in crop species? A theoretical analysis. *Plant Physiol* **164**:2247–2261.
- 880   Merlin C, Masters M. 2003. Why is carbonic anhydrase essential to *Escherichia coli*? *J Bacteriol*  
881       **185**. doi:10.1128/JB.185.21.6415
- 882   Mueller-Cajar O. 2017. The Diverse AAA+ Machines that Repair Inhibited Rubisco Active Sites.  
883       *Front Mol Biosci* **4**:31.
- 884   Mueller-Cajar O, Morell M, Whitney SM. 2007. Directed evolution of rubisco in *Escherichia coli*  
885       reveals a specificity-determining hydrogen bond in the form II enzyme. *Biochemistry*  
886       **46**:14067–14074.
- 887   Nevins CP, Vierck JL, Bogachus LD, Velotta NS, Castro-Munozledo F, Dodson MV. 2005. An  
888       Inexpensive Method for Applying Nitrogen Evaporation to Hexane-containing 24- or 96-well  
889       Plates. *Cytotechnology* **49**:71–75.
- 890   Occhialini A, Lin MT, Andralojc PJ, Hanson MR, Parry MAJ. 2016. Transgenic tobacco plants  
891       with improved cyanobacterial Rubisco expression but no extra assembly factors grow at  
892       near wild-type rates if provided with elevated CO<sub>2</sub>. *Plant J* **85**:148–160.
- 893   Oltrogge LM, Chaijarasphong T, Chen AW, Bolin ER, Marqusee S, Savage DF. 2020.  
894       Multivalent interactions between CsoS2 and Rubisco mediate  $\alpha$ -carboxysome formation.  
895       *Nat Struct Mol Biol* **27**:281–287.
- 896   Orr DJ, Worrall D, Lin MT, Carmo-Silva E, Hanson MR, Parry MAJ. 2020. Hybrid  
897       Cyanobacterial-Tobacco Rubisco Supports Autotrophic Growth and Procarboxysomal  
898       Aggregation. *Plant Physiol* **182**:807–818.
- 899   Orth JD, Fleming RMT, Palsson BØ. 2010. Reconstruction and Use of Microbial Metabolic  
900       Networks: the Core *Escherichia coli* Metabolic Model as an Educational Guide. *EcoSal Plus*  
901       **4**:1–47.
- 902   Peekhaus N, Conway T. 1998. What's for dinner?: Entner-Doudoroff metabolism in *Escherichia*  
903       coli. *J Bacteriol* **180**:3495.
- 904   Pellicer MT, Nuñez MF, Aguilar J, Badia J, Baldoma L. 2003. Role of 2-Phosphoglycolate  
905       Phosphatase of *Escherichia coli* in Metabolism of the 2-Phosphoglycolate Formed in DNA  
906       Repair. *J Bacteriol* **185**:5815–5821.
- 907   Price GD, Badger MR. 1989a. Isolation and characterization of high CO<sub>2</sub>-requiring-mutants of  
908       the cyanobacterium *Synechococcus* PCC7942: two phenotypes that accumulate inorganic  
909       carbon but are apparently unable to generate CO<sub>2</sub> within the carboxysome. *Plant Physiol*  
910       **91**:514–525.
- 911   Price GD, Badger MR. 1989b. Expression of Human Carbonic Anhydrase in the  
912       Cyanobacterium *Synechococcus* PCC7942 Creates a High CO<sub>2</sub>-Requiring Phenotype  
913       Evidence for a Central Role for Carboxysomes in the CO<sub>2</sub> Concentrating Mechanism. *Plant*  
914       *Physiol* **91**:505–513.
- 915   Rae BD, Long BM, Badger MR, Price GD. 2013. Functions, compositions, and evolution of the  
916       two types of carboxysomes: polyhedral microcompartments that facilitate CO<sub>2</sub> fixation in  
917       cyanobacteria and some proteobacteria. *Microbiol Mol Biol Rev* **77**:357–379.
- 918   Raven JA, Beardall J, Sánchez-Baracaldo P. 2017. The possible evolution and future of CO<sub>2</sub>-  
919       concentrating mechanisms. *J Exp Bot* **68**:3701–3716.
- 920   Sage RF, Sage TL, Kocacinar F. 2012. Photorespiration and the evolution of C<sub>4</sub>  
921       photosynthesis. *Annu Rev Plant Biol* **63**:19–47.
- 922   Sawaya MR, Cannon GC, Heinhorst S, Tanaka S, Williams EB, Yeates TO, Kerfeld C a. 2006.  
923       The structure of beta-carbonic anhydrase from the carboxysomal shell reveals a distinct  
924       subclass with one active site for the price of two. *J Biol Chem* **281**:7546–7555.
- 925   Scott KM, Leonard JM, Boden R, Chaput D, Dennison C, Haller E, Harmer TL, Anderson A,  
926       Arnold T, Budenstein S, Brown R, Brand J, Byers J, Calarco J, Campbell T, Carter E,  
927       Chase M, Cole M, Dwyer D, Grasham J, Hanni C, Hazle A, Johnson C, Johnson R, Kirby B,

- 928 Lewis K, Neumann B, Nguyen T, Nino Charari J, Morakinyo O, Olsson B, Roundtree S,  
929 Skjerve E, Ubaldini A, Whittaker R. 2019. Diversity in CO<sub>2</sub>-Concentrating Mechanisms  
930 among Chemolithoautotrophs from the Genera *Hydrogenovibrio*, *Thiomicrothabodus*, and  
931 *Thiomicrospira*, Ubiquitous in Sulfidic Habitats Worldwide. *Appl Environ Microbiol* **85**:1–19.  
932 Sezonov G, Joseleau-Petit D, D'Ari R. 2007. *Escherichia coli* physiology in Luria-Bertani broth. *J*  
933 *Bacteriol* **189**:8746–8749.
- 934 Shih PM, Occhialini A, Cameron JC, Andralojc PJ, Parry MAJ, Kerfeld CA. 2016. Biochemical  
935 characterization of predicted Precambrian RuBisCO. *Nat Commun* **7**:10382.
- 936 Stauffer GV. 2004. Regulation of Serine, Glycine, and One-Carbon Biosynthesis. *EcoSal Plus*  
937 **1**:1–22.
- 938 Stolper DA, Revsbech NP, Canfield DE. 2010. Aerobic growth at nanomolar oxygen  
939 concentrations. *Proc Natl Acad Sci U S A* **107**:18755–18760.
- 940 Szyperki T. 1995. Biosynthetically directed fractional <sup>13</sup>C-labeling of proteinogenic amino  
941 acids. An efficient analytical tool to investigate intermediary metabolism. *Eur J Biochem*  
942 **232**:433–448.
- 943 Taymaz-Nikerel H, Borujeni AE, Verheijen PJT, Heijnen JJ, van Gulik WM. 2010. Genome-  
944 derived minimal metabolic models for *Escherichia coli* MG1655 with estimated in vivo  
945 respiratory ATP stoichiometry. *Biotechnol Bioeng* **107**:369–381.
- 946 Tsai Y-CC, Lapina MC, Bhushan S, Mueller-Cajar O. 2015. Identification and characterization of  
947 multiple rubisco activases in chemoautotrophic bacteria. *Nat Commun* **6**:8883.
- 948 Uden G, Dünwald P. 2008. The Aerobic and Anaerobic Respiratory Chain of *Escherichia coli*  
949 and *Salmonella enterica*: Enzymes and Energetics. *EcoSal Plus* **3**.  
950 doi:10.1128/ecosalplus.3.2.2
- 951 Wang L, Jonikas MC. 2020. The pyrenoid. *Curr Biol* **30**:R456–R458.
- 952 Wheatley NM, Sundberg CD, Gidaniyan SD, Cascio D, Yeates TO. 2014. Structure and  
953 identification of a pterin dehydratase-like protein as a ribulose-bisphosphate  
954 carboxylase/oxygenase (RuBisCO) assembly factor in the  $\alpha$ -carboxysome. *J Biol Chem*  
955 **289**:7973–7981.
- 956 Wildman SG. 2002. Along the trail from Fraction I protein to Rubisco (ribulose bisphosphate  
957 carboxylase-oxygenase). *Photosynth Res* **73**:243–250.
- 958 Wilson RH, Martin-Avila E, Conlan C, Whitney SM. 2018. An improved *Escherichia coli* screen  
959 for Rubisco identifies a protein-protein interface that can enhance CO<sub>2</sub>-fixation kinetics. *J*  
960 *Biol Chem* **293**:18–27.
- 961 Winkler ME, Ramos-Montañez S. 2009. Biosynthesis of Histidine. *EcoSal Plus* **3**:1–33.
- 962 Wu A, Hammer GL, Doherty A, von Caemmerer S, Farquhar GD. 2019. Quantifying impacts of  
963 enhancing photosynthesis on crop yield. *Nat Plants* **5**:380–388.

964

965

## 966 Figures Supplements

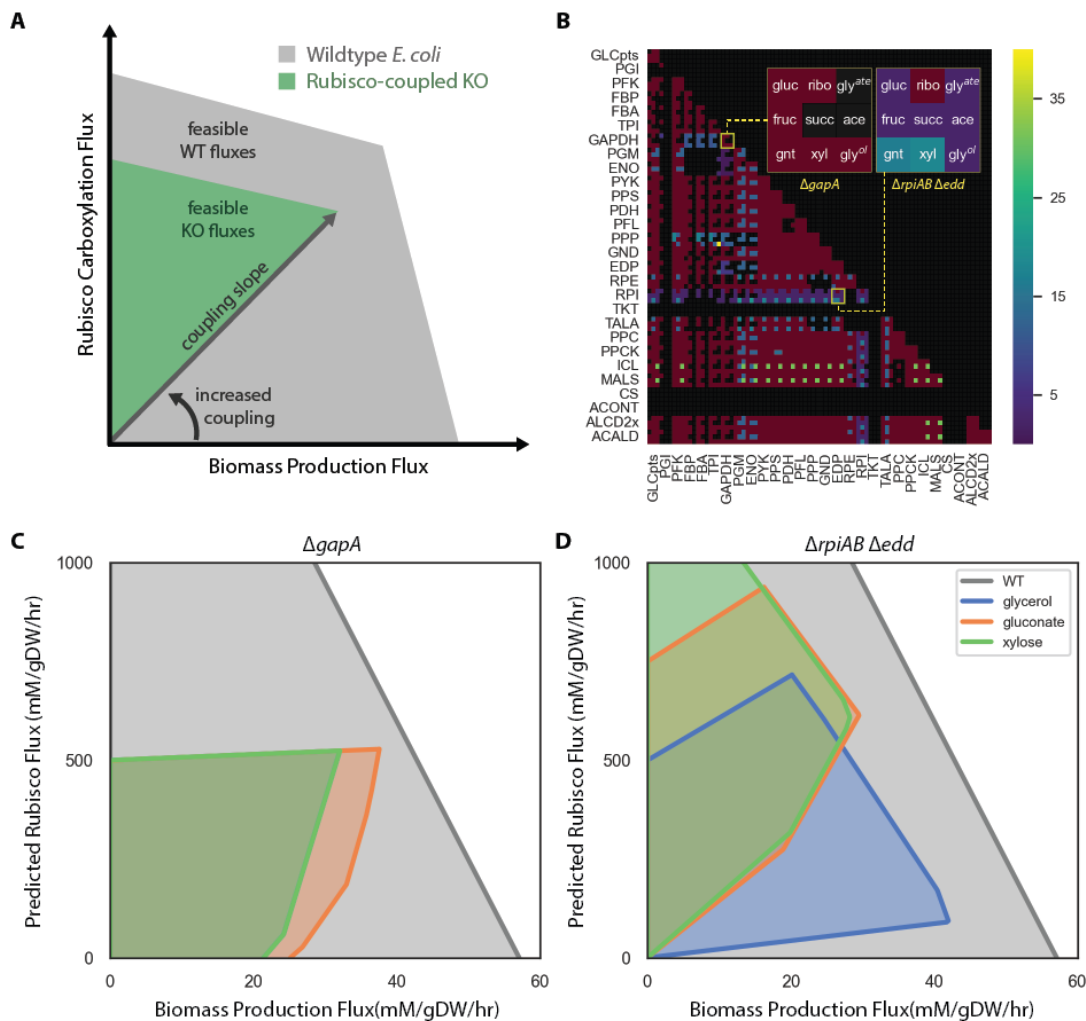

967  
 968 **Figure 2 - figure supplement 1. The OptSlope algorithm for designing rubisco-coupled *E. coli* strains.** Optslope  
 969 searches for metabolic knockout mutants in which biomass production is coupled to flux through a reaction of choice  
 970 (e.g. rubisco) at all growth rates. (A) Shows the space of feasible biomass production and rubisco fluxes for wildtype  
 971 (WT, grey) and a knockout mutant (green). For WT, biomass production and, therefore, growth rate, are independent  
 972 of rubisco at all feasible growth rates (i.e. within the grey polygon). The mutant is “rubisco-coupled” because maximal  
 973 biomass production requires non-zero rubisco carboxylation flux and increasing biomass production demands  
 974 increased carboxylation. The slope of this relationship is the “coupling slope.” (B) We computationally generated pairs  
 975 of *E. coli* central metabolic knockouts and calculated the coupling slope on nine carbon sources: glucose (gluc), fructose  
 976 (fruc), gluconate (gnt), ribose (ribo), succinate (succ), xylose (xyl), glycerate (gly<sup>ate</sup>), acetate (ace) and glycerol (gly<sup>ol</sup>).  
 977 Each double knockout is summarized as a 3×3 matrix of coupling slopes. Black denotes a rubisco-independent mutant  
 978 and maroon a coupling slope of 0. The published mutant  $\Delta gapA$  (Mueller-Cajar et al., 2007) has a coupling slope of 0  
 979 (left), while the  $\Delta rpiAB \Delta edd$  strain is rubisco-coupled on seven of the carbon sources (right). (C) Feasible phase space  
 980 diagram for the  $\Delta gapA$  strain shows that biomass production is not coupled to rubisco flux. (D)  $\Delta rpiAB \Delta edd$  has a  
 981 positive coupling slope in glycerol, gluconate and xylose media.

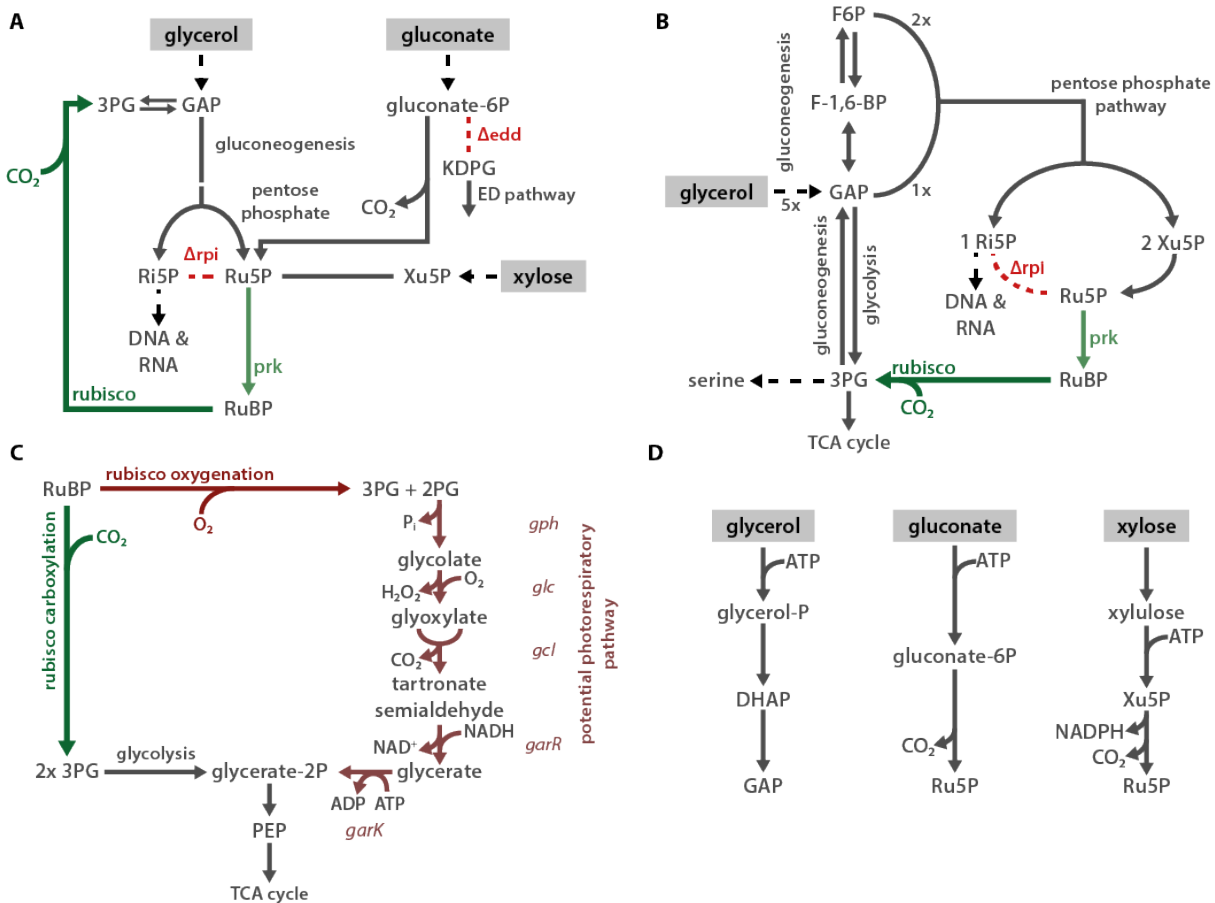

982  
983  
984  
985  
986  
987  
988  
989  
990  
991  
992  
993  
994  
995  
996  
997  
998  
999  
1000  
1001  
1002  
1003  
1004  
1005

**Figure 2 - figure supplement 2. Proposed mechanisms of rubisco-dependent growth in CCMB1.** (A) CCMB1 depends on rubisco and *prk* for growth in glycerol, gluconate, and xylose minimal media. The common mechanism is an inability to metabolize ribulose-5-phosphate (Ru5P) due to the deletion of both ribose-phosphate isomerase genes ( $\Delta rpiAB$ ). When gluconate or xylose is the growth substrate, Ru5P must be produced in order to metabolize the carbon source. Though wild type *E. coli* can metabolize gluconate via the ED pathway, the ED dehydratase knockout ( $\Delta edd$ ) in CCMB1 blocks this route and forces 1:1 production of Ru5P from gluconate. Expression of *prk* and *rubisco* opens a new route of Ru5P metabolism, thus enabling CCMB1 to grow in gluconate or xylose media. Since extracellular glycerol is converted to glyceraldehyde 3-phosphate (GAP), it can be metabolized through lower glycolysis or through gluconeogenesis. The gluconeogenesis route produces hexoses that enter the pentose phosphate pathway, which is required to synthesize ribose 5-phosphate (Ri5P) for nucleotide and histidine biosynthesis. Depending on the growth rate, products of Ri5P make up 5-25% of *E. coli* biomass (Bremer and Dennis, 2008; Taymaz-Nikerel et al., 2010). As shown in (B), the pentose phosphate pathway forces co-production of Ri5P, Ru5P and xylulose 5-phosphate (Xu5P). In the absence of *rpi* activity, there is no pathway for metabolism of Xu5P or Ru5P. This defect is complemented by the expression of *rubisco* and *prk*. Notably, *rubisco* can also oxygenate RuBP, as shown in (C). *E. coli* can, in principle, recycle the oxygenation product 2-phosphoglycolate (2PG) through an ersatz photorespiratory pathway via tartronate semialdehyde. This pathway is not the dominant mechanism of rubisco complementation because CCMB1:p1A cannot grow in ambient air, where  $O_2$  is abundant (Figure 2D). Panel (D) describes the initial metabolism of extracellular glycerol, gluconate and xylose in *E. coli*. Extracellular carbon sources are marked with a grey background throughout. Abbreviations: 3-phosphoglycerate (3PG), 2-phosphoglycolate (2PG), glyceraldehyde 2-phosphate (GAP), dihydroxyacetone phosphate (DHAP), ribose 5-phosphate (Ri5P), ribulose 5-phosphate (Ru5P), xylulose 5-phosphate (Xu5P), ribulose 1,5-bisphosphate (RuBP), 2-keto-3-deoxy-6-phosphogluconate (KDGP), fructose 6-phosphate (F6P), fructose 1,6-bisphosphate (F-1,6-BP), phosphoenolpyruvate (PEP).

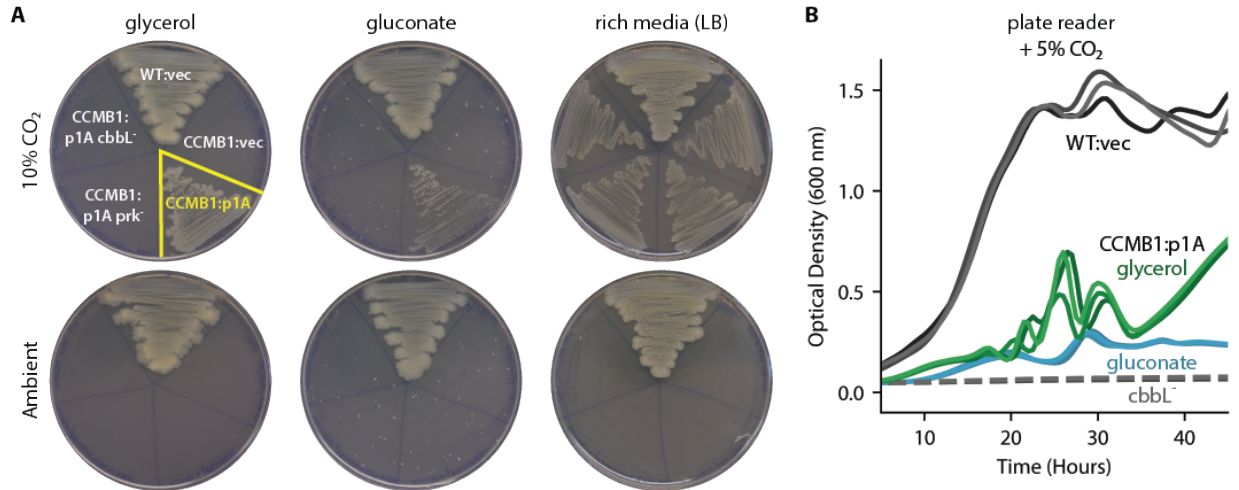

1006  
1007  
1008  
1009  
1010  
1011  
1012  
1013  
1014  
1015  
1016  
1017  
1018  
1019

**Figure 2 - figure supplement 3. CCMB1 depends on rubisco and prk for growth in minimal media. (A)** Expression of rubisco and prk complements CCMB1 growth on M9 glycerol and gluconate media under 10% CO<sub>2</sub>, but not in ambient conditions (100 nM aTc induction in M9 plates). Mutations ablating rubisco (cbbL<sup>-</sup>) or prk (prk<sup>-</sup>) activity abrogate growth in selective media but not in LB under 10% CO<sub>2</sub>. Growth in LB is rubisco-independent in 10% CO<sub>2</sub>, but CCMB1 does not grow in ambient air even when supplied rich media because it lacks CA genes (Merlin and Masters, 2003). Growth curves in (B) show the rubisco-dependence of CCMB1:p1A growth in glycerol (green) and gluconate (blue) media under 5% CO<sub>2</sub> in a gas controlled plate reader (Tecan Spark, Methods). Negative controls (CCMB1:p1A cbbL<sup>-</sup> in glycerol or gluconate media) and uninduced cultures failed to grow in these conditions (dashed grey lines). Though three curves are plotted for each condition in (B), experiments were conducted in technical sextuplicate. Replicates were all consistent.



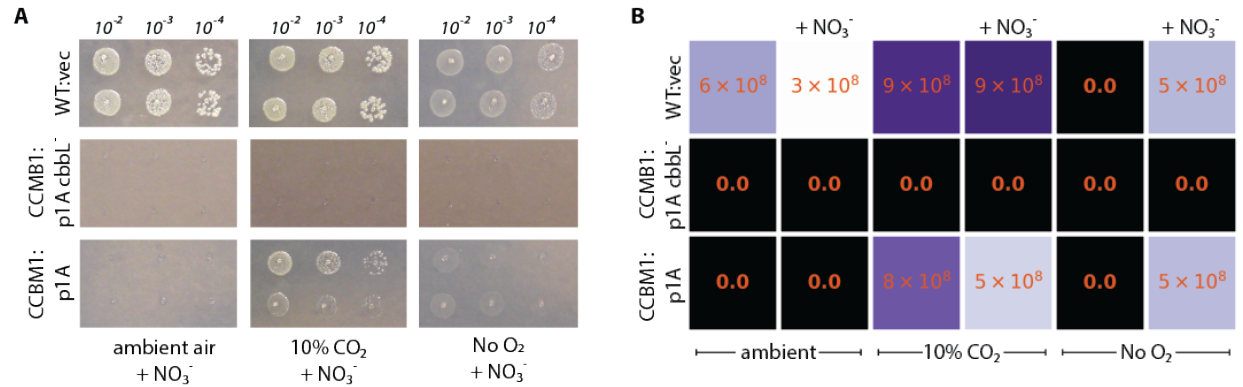

1020  
1021  
1022  
1023  
1024  
1025  
1026  
1027  
1028  
1029

**Figure 2 - figure supplement 4. CCMB1 does not require oxygen for growth in minimal media.** (A) Titer plating assays were used to measure the viability of CCMB1:p1A grown on glycerol media under ambient air ( $\approx 0.04\%$  CO<sub>2</sub>, 21% O<sub>2</sub>), 10% CO<sub>2</sub> (balance air), and an anoxic mix of 10% CO<sub>2</sub> and 90% N<sub>2</sub> ("No O<sub>2</sub>"). Since *E. coli* cannot ferment glycerol, 20 mM NO<sub>3</sub><sup>-</sup> was provided as an alternate electron acceptor as marked. (B) CCMB1:p1A grows on glycerol media in the absence of O<sub>2</sub> so long as nitrate is provided. While CCMB1:p1A colonies are noticeably smaller than WT in panel (A), the colony count is indistinguishable, as quantified in panel (B). Experiments were conducted in biological duplicate (i.e. pre-cultures from distinct colonies) with at least two technical replicates (repeated spotting from the same preculture).

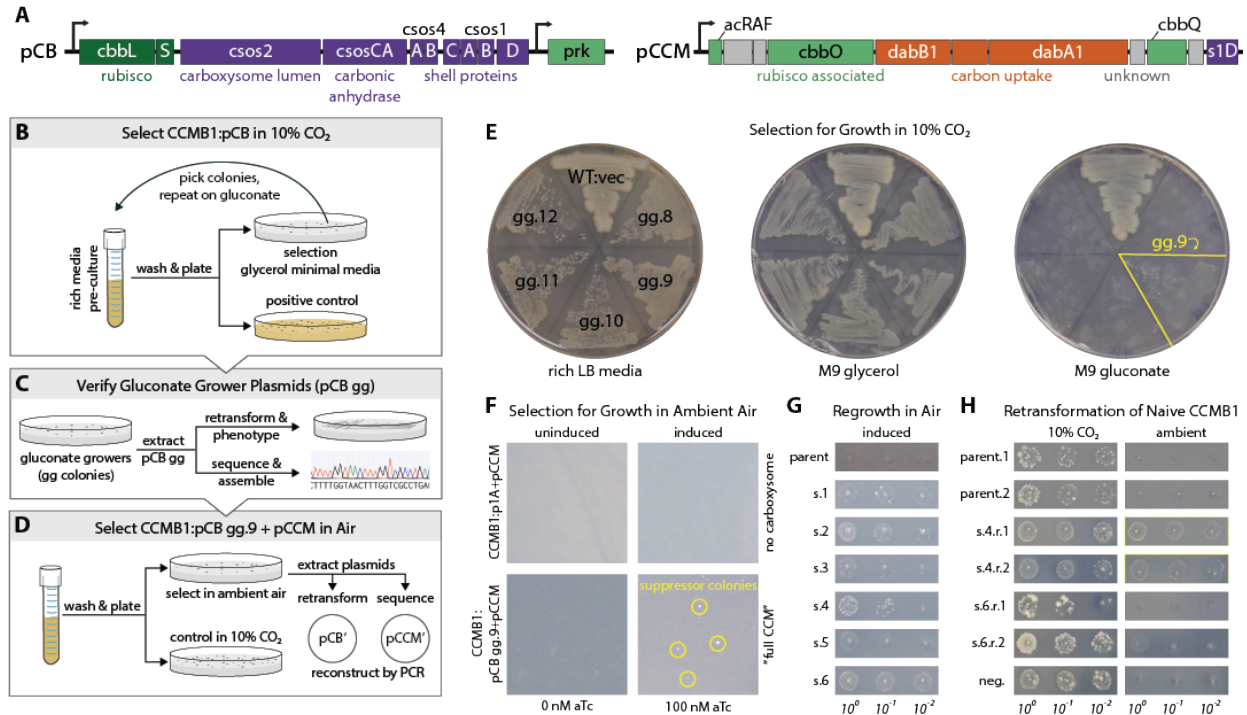

1030  
1031  
1032  
1033  
1034  
1035  
1036  
1037  
1038  
1039  
1040  
1041  
1042  
1043  
1044  
1045  
1046  
1047  
1048  
1049  
1050  
1051  
1052  
1053  
1054  
1055  
1056  
1057  
1058

**Figure 3 - figure supplement 1. A series of selection experiments produced mutant plasmids that permit rubisco-dependent growth in ambient air.** (A) pCB and pCCM plasmids together encode 20 *H. neapolitanus* genes including 12 confirmed CCM components. pCB carries kanamycin resistance and has two transcriptional units expressed under an aTc-inducible  $P_{LtetO-1}$  promoter (Lutz and Bujard, 1997). The first derives from pHnCB10 (Bonacci et al., 2012) and expresses 10 carboxysome proteins. The second expresses phosphoribulokinase (prk). pCCM carries chloramphenicol resistance and expresses an 11 gene operon from *H. neapolitanus* that contains both putative and confirmed CCM genes (Desmarais et al., 2019). Although pCB expresses both rubisco and prk, CCMB1:pCB did not initially grow in M9 media under 10% CO<sub>2</sub> (not shown) and so we undertook a series of selections, described in panels (B-D) that ultimately led to isolation of pCB' and pCCM' plasmids that together enable CCMB1 to grow in ambient air. (B) We first selected CCMB1:pCB for growth on minimal media by screening for mutants able to grow on M9 glycerol and then M9 gluconate media. Gluconate growing mutant #9 (gg.9) was used for subsequent experiments as this mutant was found to grow best on gluconate (as shown in E). (C) Plasmid extracted from gg.9 was deep sequenced and electroporated into naive CCMB1 to test for plasmid linkage of growth on minimal. (D) Selection for rubisco-dependent growth in ambient air. A turbid pre-culture of the CCMB1:pCB gg.9+pCCM double transformant was washed and plated on M9 glycerol media under ambient air. Colonies formed after ≈20 days (as shown in F). 40 colonies (s.1-40) were picked into rich media, grown to saturation, washed and plated on M9 glycerol media to verify growth under ambient air. Roughly 1/4 of chosen colonies regrew under ambient air to varying degrees (s.1-6 are shown in G). Plasmid extracted from several strains was deep-sequenced and electroporated into naive CCMB1 to test plasmid-linkage of growth on glycerol minimal media in ambient air. Pooled plasmid extracted from s.4 was found to confer replicable growth in ambient air (as shown in H). PCR and Gibson cloning were used to reconstruct the individual pCB and pCCM plasmids from this pool. We termed these reconstructed plasmids pCB' and pCCM'. (E) Restreaking of gluconate-growing mutants gg.8-12 described in panel B shows that gg.9 grew best on gluconate. (F) CCMB1:pCB gg.9+pCCM double transformants were plated for mutants on M9 glycerol media under ambient air. A negative control lacking carboxysome genes (CCMB1:p1A+pCCM) was plated at the same time. Colonies formed after 20 days (bottom right) only on induced plates (100 nM) and only when all CCM genes were provided (i.e. pCB gg.9 and pCCM). (G) Several of the chosen colonies regrew in ambient air. Growth characteristics varied from colony to colony, suggesting genetic variation. (H) Pooled plasmid extracted from s.4 was found to permit naive CCMB1 to grow in ambient air. For comparison, plasmid from s.6 produced less reproducible air growth.

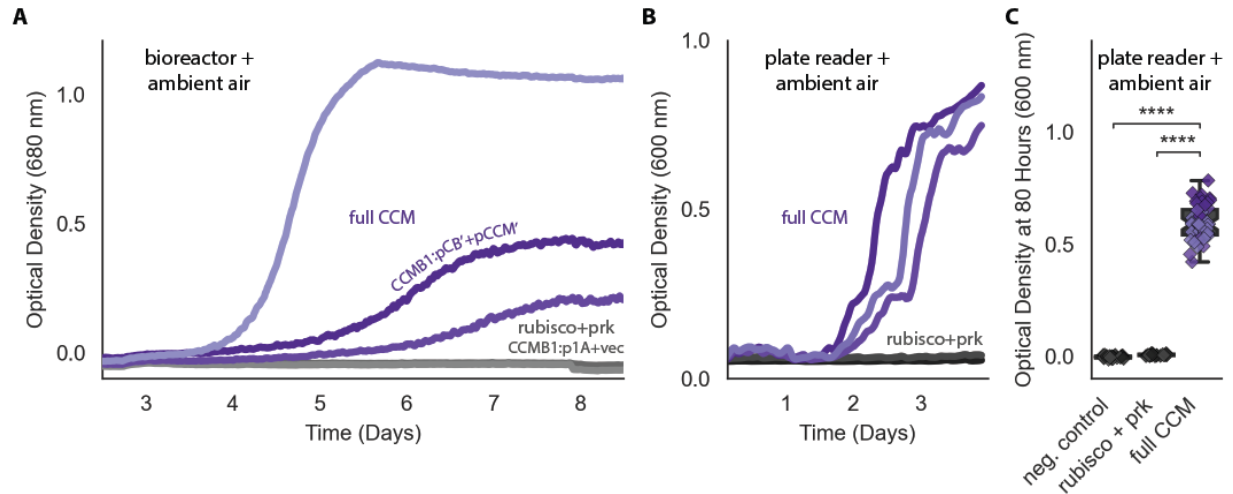

1059  
1060 **Figure 3 - figure supplement 2. pCB' and pCCM' permit CCMB1 to grow in ambient air.** (A) Biological triplicate  
1061 growth curves from a bioreactor bubbling ambient air. CCMB1 co-transformed with post-selection plasmids pCB' and  
1062 pCCM' (CCMB1:pCB' + pCCM') grows well (purple, "full CCM"), while rubisco and prk alone are insufficient for growth  
1063 in air (green, "rubisco+prk"). Maximal growth rates for the "full CCM" cultures ranged from 0.03-0.06 hr<sup>-1</sup>, corresponding  
1064 to doubling times of 12-25 hours. As these are biological replicate cultures, heterogeneity in growth kinetics could be  
1065 due to genetic effects (e.g. point mutations in founding colonies) or non-genetic differences (e.g. varying degree of  
1066 carboxysome production during pre-culturing). (B) Data for the same strains grown in a 96 well plate in ambient air  
1067 in a shaking plate reader. Different shades mark biological replicates (pre-cultures deriving from three distinct colonies).  
1068 Additionally, each preculture was used to inoculate at least 12 technical replicates. (C) Quantification of the experiment  
1069 in panel (B) using endpoint data at 80 hours for biological and technical replicates. Panel (C) uses the same colors as  
1070 (A) and (B) with the addition of a rubisco active site mutant as a negative control (grey, CCMB1:p1A+ vec). '\*\*\*\*'  
1071 indicates  $P < 10^{-10}$ . P-values were calculated with a Bonferroni-corrected two-sided Mann-Whitney-Wilcoxon test. 10<sup>4</sup>-  
1072 fold bootstrapping was used to compare "full CCM" data to "rubisco + prk" and estimate a confidence interval for the  
1073 effect of expressing a full CCM on growth in ambient air, which gave a 99.9% confidence interval of 0.56-0.64 OD units.  
1074

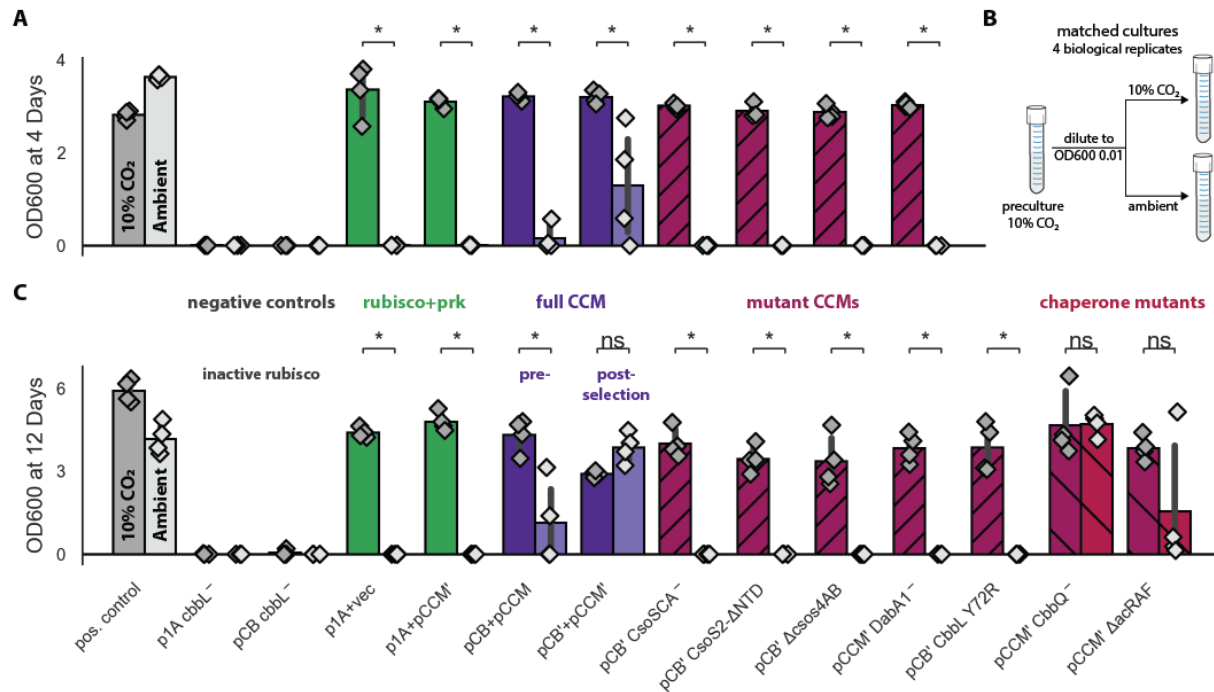

1075  
 1076 **Figure 4 - figure supplement 1. Targeted mutations to the CCM eliminate growth in ambient air.** Pre-cultures  
 1077 were grown to saturation in 10% CO<sub>2</sub> and then diluted to an optical density of 0.01 (600 nm) into two tubes (Methods).  
 1078 One tube was grown in 10% CO<sub>2</sub> and the other in ambient air, as diagrammed in (B). Cells were incubated for 4 days  
 1079 before measuring optical density in (A) and 12 days in (C). The left bar (darker color) gives the mean endpoint density  
 1080 of biological quadruplicate cultures in 10% CO<sub>2</sub> and the right bar (lighter color) gives the mean in ambient air. Error  
 1081 bars give a 95% confidence interval of measurements. (A) and (C) share the leftmost 11 strains. From left to right:  
 1082 a positive control (grey, grows in both conditions), two negative controls carrying active site mutants of rubisco  
 1083 (CCMB1:p1A<sup>-</sup>+vec and CCMB1:pCB<sup>-</sup>+pCCM'), CCMB1 expressing rubisco and prk but no CCM genes (green,  
 1084 CCMB1:p1A+vec) or an incomplete set of CCM genes (green, CCMB1:p1A+pCCM'), CCMB1:pCB+pCCM which  
 1085 carries the pre-selection CCM plasmids (purple), and CCMB1:pCB'+pCCM' which carries the post-selection plasmids.  
 1086 "vec" denotes an appropriate vector control (pFA-sfGFP). The following pairs of maroon bars describe strains carrying  
 1087 plasmids with targeted CCM mutations: CCMB1:pCB' CsoSCA<sup>-</sup>+pCCM' which carries an inactivating mutation to  
 1088 carboxysomal carbonic anhydrase, CCMB1:pCB' CsoS2 ΔNTD +pCCM' harboring a deletion of the N-terminal domain  
 1089 of CsoS2 responsible for recruiting rubisco to the carboxysome, CCMB1:pCB' ΔcsoS4AB + pCCM' lacking both genes  
 1090 pentameric vertex proteins, and CCMB1:pCB' DabA1<sup>-</sup> + pCCM' carrying an inactivated DAB carbon uptake system.  
 1091 (A) CCMB1 grows well in ambient air only when given a full complement of CCM genes on the post-selection plasmids.  
 1092 All mutations to the CCM abrogate growth in air (maroon). Panel (C) shows consistent results over a 12-day time period.  
 1093 (C) describes three additional mutants: CCMB1:pCB' CbbL Y72R + pCCM' carrying a mutation to the rubisco large  
 1094 subunit that eliminates rubisco-CsoS2 binding, CCMB1:pCB' + pCCM' CbbQ<sup>-</sup> harboring inactivating mutation to the  
 1095 CbbQ subunit of the rubisco activase complex, and CCMB1:pCB' + pCCM' ΔacRAF lacking the putative rubisco  
 1096 chaperone acRAF (CCMB1:pCB' + pCCM' ΔacRAF). Ablation of rubisco-CsoS2 interaction should eliminate  
 1097 recruitment of rubisco to the carboxysome (Oltrogge et al., 2020). Accordingly, the Y72R mutation eliminated growth in  
 1098 air. Chaperone mutants (CbbQ or acRAF) were both viable in air, though removal of acRAF produced a substantial  
 1099 growth defect (2.5 fold in mean and 8.5 fold in median final density). The positive control strain is the CAfree  
 1100 strain expressing human carbonic anhydrase II (Methods). P-values calculated by a one-sided Mann-Whitney-Wilcoxon test.  
 1101 \*\*\*) denotes a P < 0.05. Detailed description of all plasmid abbreviations is given in Table S2.

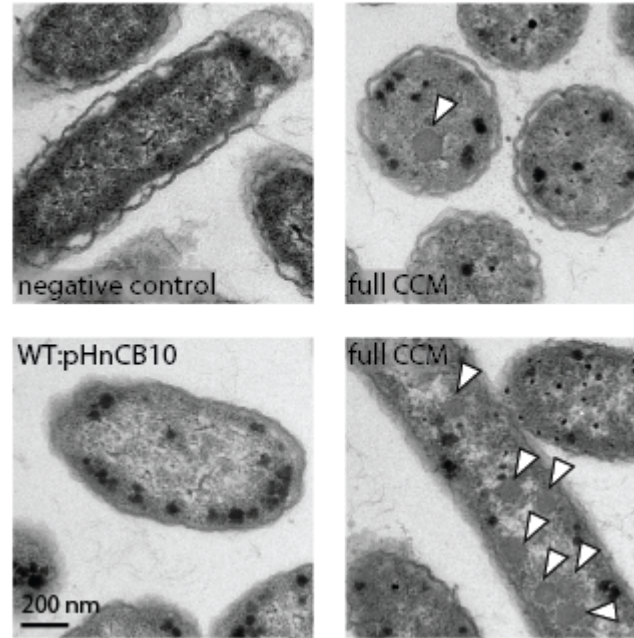

1102  
1103  
1104  
1105  
1106  
1107  
1108  
1109  
1110  
1111  
1112

**Figure 5 - figure supplement 1. CCMB1:pCB' + pCCM' produces polyhedral bodies resembling carboxysomes when grown in ambient air.** Transmission electron micrographs of air-grown CCMB1:pCB'+pCCM' (images on the right) show morphological carboxysomes inside cells (white arrows). The negative control for carboxysome expression is CAfree:pFE-sfGFP + pFA-HCAII (top left). WT:pHnCB10 is the parent strain transformed with a plasmid expressing 10 carboxysome genes and previously shown to enable purification of carboxysome structures from *E. coli* (Bonacci et al., 2012). This was intended as a positive control, but we did not observe carboxysome structures in electron micrographs of this strain, perhaps because of excessive IPTG induction (500 mM) as previously reported. Expression of carboxysome genes was associated with production of black staining stress granules in both the experiment and pHnCB10 control. These granules were not observed in images of the negative control.



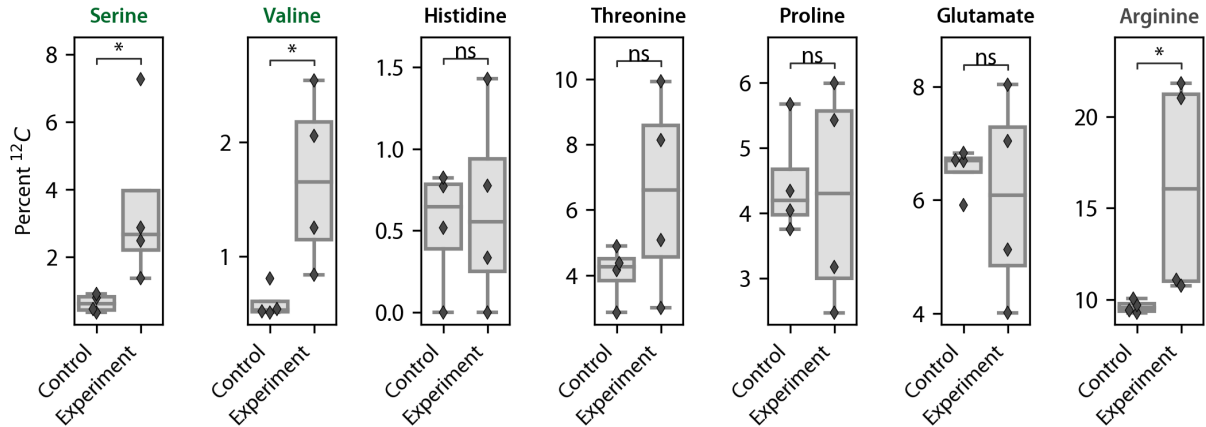

1113  
1114  
1115  
1116  
1117  
1118  
1119  
1120  
1121  
1122  
1123  
1124  
1125  
1126  
1127  
1128  
1129

**Figure 5 - figure supplement 2. Isotopic composition of amino acids from total biomass hydrolysate.** Cells were grown under ambient air in M9 media containing 99% <sup>13</sup>C labeled glycerol (0.4% v/v) so that nearly all <sup>12</sup>C in biomass must derive from inorganic carbon. The isotopic composition of amino acids in total biomass hydrolysate of CCMB1:pCB' + pCCM' and an appropriate rubisco-independent control were measured via LC-MS (Methods). The control strain is CAfree complemented with the human carbonic anhydrase II, which does not express rubisco (Methods). Serine and valine, which are marked in green, are downstream of the rubisco product 3PG in E. coli central metabolism and, accordingly, show significantly greater <sup>12</sup>C incorporation in CCMB1:pCB' + pCCM' than the control. Histidine, threonine, proline and glutamate are synthesized from precursors deriving from the TCA cycle and pentose phosphate pathways, and thus their carbon atoms do not derive from 3PG (Szyperski, 1995). Arginine is synthesized via a rubisco-independent carboxylation of glutamate (by the addition of carboxyphosphate, (Gleizer et al., 2019)), and so the difference between arginine and glutamate labeling is used to calculate the isotopic composition of intracellular inorganic carbon (C<sub>i</sub>, Methods). Notably, intracellular C<sub>i</sub> derives both from extracellular C<sub>i</sub> (predominantly <sup>12</sup>C) and decarboxylation of the 99% <sup>13</sup>C glycerol carbon source. As such, the composition will depend on C<sub>i</sub> uptake as well as the rate of glycerol metabolism. Control cells grew faster than CCMB1:pCB'+pCCM, which can explain why arginine from these cells contains significantly less <sup>12</sup>C and more <sup>13</sup>C (from rapid glycerol decarboxylation).

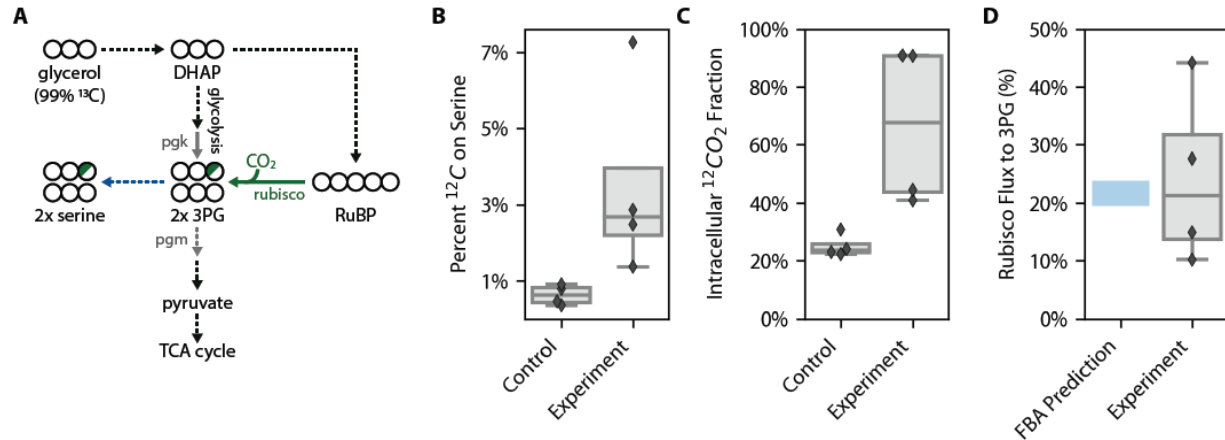

1130  
 1131 **Figure 5 - figure supplement 1.  $^{12}\text{C}$  enrichment on serine is consistent with in vivo  $\text{CO}_2$  fixation.** Cells were grown  
 1132 under ambient air in M9 media containing 99%  $^{13}\text{C}$  labeled glycerol (0.4% v/v) so that nearly all  $^{12}\text{C}$  in biomass must  
 1133 derive from inorganic carbon. In (A)  $^{13}\text{C}$  atoms are depicted as open circles and fractional  $^{12}\text{C}$  labeling by a partial green  
 1134 fill color. In CCMB1, 3-phosphoglycerate (3PG) can be produced either through glycolytic metabolism of glycerol (via  
 1135 dihydroxyacetone-phosphate, DHAP) or through rubisco-catalyzed carboxylation of RuBP. At most  $\frac{1}{6}$  of the carbon  
 1136 atoms on 3PG will be  $^{12}\text{C}$  when rubisco is active in vivo. In practice this fraction will be less than  $\frac{1}{6}$  because some of  
 1137 the intracellular inorganic carbon pool ( $\text{C}_i$ ) derives from decarboxylation of  $^{13}\text{C}$  labeled glycerol and also because a  
 1138 large fraction of intracellular 3PG is produced through glycolysis (Methods). Serine is a direct metabolic product of 3PG  
 1139 and so reports on the labeling of 3PG. As such, we measured the  $^{12}\text{C}$  composition of amino acids in total protein  
 1140 hydrolysate via LC-MS (Methods). (B) Serine from CCM-expressing CCMB1 cells ('Experiment') displayed roughly  
 1141 threefold higher  $^{12}\text{C}$  labeling than controls, which grow in a rubisco-independent manner (Methods). (C) Rubisco  
 1142 carboxylation draws from the intracellular inorganic carbon pool, whose  $^{12}\text{C}$  composition can be inferred for each  
 1143 sample by comparing the labeling of L-arginine and L-glutamate (Methods). The mean  $^{12}\text{C}$  fraction of intracellular  $\text{C}_i$   
 1144 was estimated to be  $25\% \pm 4\%$  and  $67\% \pm 28\%$  for the control and experiment respectively. (D) These values were  
 1145 integrated to estimate the percent of 3PG production flux that is due to carboxylation by rubisco (Methods), which was  
 1146 inferred to be  $24\% \pm 15\%$ . These values compare favorably with predictions made via Flux Balance Analysis (19.5-  
 1147 24%, Methods). A sampling method was used to estimate the uncertainty in these rubisco flux inferences (Methods).  
 1148 99% confidence intervals on the rubisco flux fraction were strictly positive for each biological replicate, with 99% of all  
 1149 posterior estimates between 4% and 51% across all four replicates.
